# Supplementary material
Source: Copernicus journal article supplement (doi:10.5194/egusphere-2023-2153)

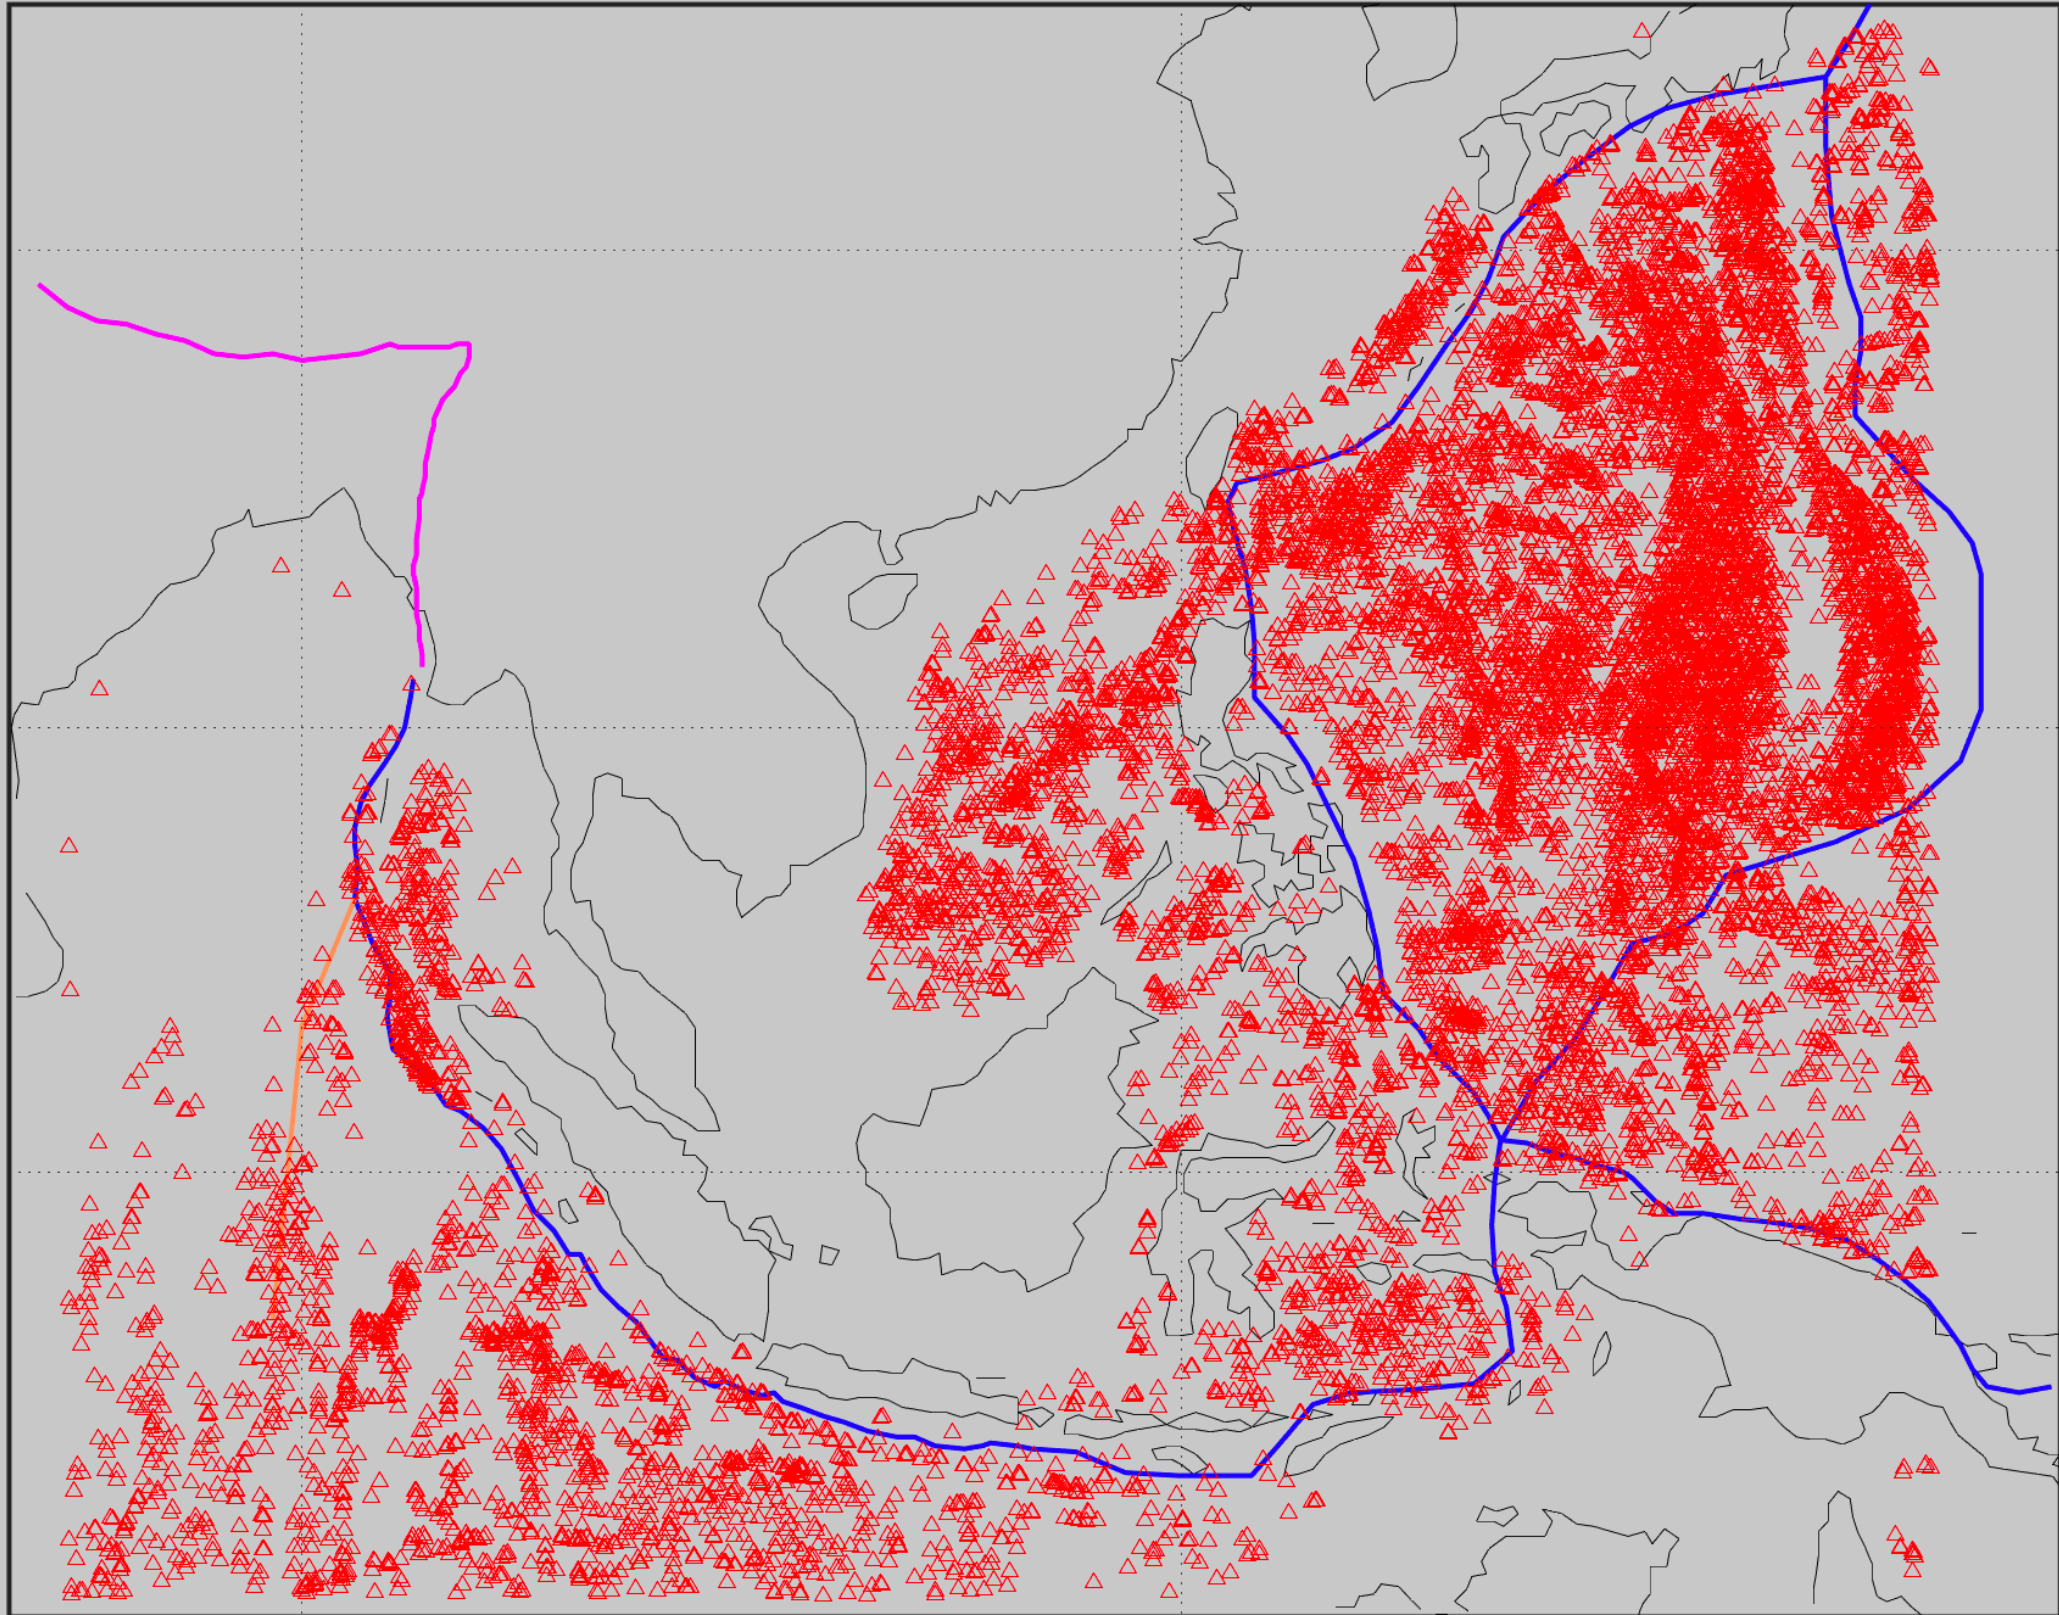

Supplement: Supplementary file [file egusphere-2023-2153-RC1-supplement.pdf]
