# Supplementary material
Source: Copernicus journal article supplement (doi:10.5194/egusphere-2023-2153)
Supplement: Supplementary file [file egusphere-2023-2153-RC2-supplement.pdf]

# SEATANI: hazards from seamounts in SouthEast Asia, Taiwan, and Andaman and Nicobar Islands (eastern India)

Andrea Verolino (✉ [andrea\\_verolino@hotmail.it](mailto:andrea_verolino@hotmail.it))

Earth Observatory of Singapore <https://orcid.org/0000-0002-9335-3993>

Su Fen Wee

Nanyang Technological University

Susanna Jenkins

Nanyang Technological University <https://orcid.org/0000-0002-7523-1423>

Fidel Costa

Institut de Physique du Globe de Paris

Adam Switzer

Nanyang Technological University <https://orcid.org/0000-0002-4352-7852>

---

## Article

### Keywords:

**Posted Date:** September 18th, 2023

**DOI:** <https://doi.org/10.21203/rs.3.rs-2950249/v2>

**License:**   This work is licensed under a Creative Commons Attribution 4.0 International License.

[Read Full License](#)

**Additional Declarations:** Yes there is potential Competing Interest. In order to avoid any conflict of interest, we declare that co-author A.D. Switzer is a member of the editorial board for Communications Earth & Environment (Ocean and Cryosphere).

---

# SEATANI: hazards from seamounts in SouthEast Asia, Taiwan, and Andaman and Nicobar Islands (eastern India)

Andrea Verolino<sup>1</sup>, Su Fen Wee<sup>2</sup>, Susanna F. Jenkins<sup>1,2</sup>, Fidel Costa<sup>1,2,3</sup>, Adam D. Switzer<sup>1,2</sup>

<sup>1</sup>Earth Observatory of Singapore, Nanyang Technological University, 50 Nanyang Ave, Singapore, 639798, Singapore

<sup>2</sup>Asian School of Environment, Nanyang Technological University, 50 Nanyang Ave, Singapore, 639798, Singapore

<sup>3</sup>Institut de Physique du Globe de Paris, Université Paris Cite, CNRS, 1 Rue Jussieu, Paris, 75005, France

Correspondence to: Andrea Verolino

Email: andrea.verolino@ntu.edu.sg

**Abstract.** Submarine volcanism makes up approximately 85% of volcanism taking place on Earth, and its eruptions can be particularly hazardous, with the potential to cause large-scale sector collapse of the volcanic edifice, tsunamis, and ash dispersal. Recent examples include the eruptions in Japan and in the Kingdom of Tonga in 2021 and 2022 respectively, but there has been little to no study of submarine volcanoes in Southeast Asia and its surroundings. Here we provide a compilation of 466 seamounts from the region, from different published sources, through the SEATANI dataset (Southeast Asia + Taiwan + Andaman & Nicobar Islands). We use this newly compiled dataset to assess on a regional basis the seamount hazard potential and exposure potential as a springboard for future more quantitative hazard studies for the region. The hazard potential was assessed through seamount morphological/structural analyses, to determine the seamount evolution stage and, grade of maturity. The exposure potential was evaluated through two different approaches: An areal analysis of the number of assets within a 100 km radius of each seamount; and the development of a hazard-weighted seamount density map to highlight potential areas of interest for future more-in-depth studies. Our results show that there are several potentially hazardous seamounts in this region, and Taiwan had the highest hazard and exposure potential, for all assets considered, while Philippines, Indonesia and Vietnam have relatively high exposure potential for submarine communication cables and ship traffic density. The results from this work serve as a first step for southeast Asian and neighbouring countries to become more resilient against and prepared for submarine volcanic eruptions in the region.

## 1 Introduction

Volcanic seamounts are submerged or mostly submerged volcanoes, and can be defined as “*any geographically isolated topographic feature on the seafloor taller than 100 m, including ones whose summit regions may temporarily emerge above sea level*” (Staudigel et al., 2010). The number of volcanic seamounts around the world is in the order of tens of thousands. A recent estimate suggests that there are ~35,000 seamounts >400-m in height (Gevorgian et al., 2023); however, limitations in detection suggest that this is a significant underestimate, especially in shallow continental shelf regions close to land masses (Kim and Wessel, 2011). Volcanic seamounts are generally detected through satellite-derived altimetry and gravimetry, however, these methods are limited by

39 resolution (i.e. kilometric scale, not allowing for the detection of small seamounts), and noise in the gravimetry  
40 measurements in areas with thick sequences of sediments (e.g. within continental margins; Kim and Wessel,  
41 2011). It is likely that there are many more seamounts globally than those we are aware of.

42 Traditionally, volcanic seamounts, particularly deep-sea ones, have been considered a negligible threat to  
43 society (Cas, 1992; Whelley et al., 2015), for several reasons. The first is that the majority of them lie completely  
44 underwater, hence are difficult to monitor compared to their subaerial counterparts; as a result, their eruption  
45 frequency and intensity cannot be properly assessed. A second reason is that they are often located far from major  
46 landmasses, hence not considered an imminent threat to populations. Thirdly, most of them have their summit in  
47 deep waters (> 3000 m b.s.l.), and this makes them hypothetically less hazardous than shallower volcanoes,  
48 because of the high hydrostatic pressure hindering explosivity. Another aspect is that since they are underwater,  
49 it is logistically and economically difficult to access them directly for sampling and detailed mapping. Finally,  
50 most ocean intraplate volcanoes, particularly those approaching subduction zones, are likely to be extinct and  
51 have not been active for millions of years (Staudigel and Clague, 2010), hence, have been not considered of  
52 interest for volcanic hazard. As a result, seamounts are vastly understudied around the world. In January 2022,  
53 the eruption of Hunga volcano in the SW Pacific (Kingdom of Tonga), demonstrated that erupting seamounts can  
54 have a large impact on people and their activities, even in a remote location such as the southwest Pacific Ocean.  
55 The eruption produced the highest volcanic plume ever recorded (~58 km) (Taha et al., 2022), unusually fast  
56 tsunamis that travelled across the Pacific Ocean for thousands of kilometres (Gusman et al., 2022), and damage  
57 of millions of USD across the entire region, with the Kingdom of Tonga being the most affected (damage  
58 equivalent to ~19% of the national GDP, and several casualties recorded) (The World Bank, 2022).

59 A few notable seamounts around the world have been studied in detail. Multibeam surveys have been  
60 conducted over these seamounts to obtain high resolution bathymetry (up to 1-m), and in very few cases were  
61 accompanied by sampling and/or video recording of the eruptions from Remotely Operated Vehicles (ROV's).  
62 Typically, these investigations occur after an impactful eruption. Examples include Havre volcano, in the  
63 Kermadec arc (north of New Zealand), which erupted in 2012 and produced what is considered one of the largest  
64 submarine silicic eruptions ever recorded (Carey et al., 2014; Murch et al., 2019a; Dürig et al., 2020); NW Rota-  
65 1 in the Mariana arc (Embley et al., 2006; Chadwick et al., 2008; Schnur et al., 2017), and West Mata in the Tonga  
66 arc (Clague et al., 2011; Dziak et al., 2015; Murch et al., 2022), which produced medium-intensity Strombolian  
67 explosions and lava flows (both eruptions were recorded); Fani Maoré volcano, offshore Mayotte island (NW of  
68 Madagascar), which was formed between 2018 and 2019, growing more than 800-m from the seafloor, and  
69 erupting both explosive and effusive products, despite being mostly basanitic in composition (Feuillet et al.,  
70 2021); Axial caldera, on the Juan de Fuca ridge (offshore of California, USA), which produced several effusive  
71 basaltic eruptions in recent years (last eruption in 2015), but also has evidence of past large explosive eruptions  
72 (Hammond, 1990; Caress et al., 2012; Clague et al., 2013), among others. All the above-mentioned submarine  
73 volcanoes were surveyed as part of large, well-funded, multidisciplinary projects that provided a wealth of data  
74 (bathymetry, rock geochemistry, tephra granulometry and componentry, etc.). It is logistically impossible to apply  
75 the same approaches to the thousands of seamounts worldwide, therefore, a regional approach is needed to  
76 characterise seamounts in a simple and efficient manner that allows for a broad focus on lesser-known areas  
77 potentially at risk.

78 Past studies on volcanic seamounts have been conducted globally and at times included classifications based  
79 on their morphology or growth stage (Schmidt et al., 2000; Wessel, 2007; Staudigel and Clague, 2010; Kim and  
80 Wessel, 2011; Gevorgian et al., 2023). Some authors found direct relationships between seamount morphometric  
81 parameters (e.g. basal width and height) and linked them to the tectonic setting (Schmidt et al., 2000; Gevorgian  
82 et al., 2023). These classifications, however, have never been used for assessing hazard potential or exposure on  
83 a regional scale.

84 In the particular case of Southeast Asia (SEA), there has been some effort in assessing hazards from what we  
85 define here as volcanic seamounts; examples include Krakatau and Banua Wuhu, Indonesia, and Didicas,  
86 Philippines (Hamzah et al., 2000; Paris et al., 2014; Mutaqin et al., 2019; Hidayat et al., 2020; Zorn et al., 2022;  
87 NCEI/WDS, n.d.), however, these studies focused on volcanic islands, and there is little or no consideration for  
88 the hazard potential from fully submerged volcanoes in the region.

89 Our newly compiled dataset includes 466 seamounts from different sources (Fig. 1, Table S1 – Supplementary  
90 information) and enclosed within three (Indonesia, Philippines and Vietnam) of the nine Exclusive Economic  
91 Zones (EEZs) of Southeast Asia (Brunei, Burma, Cambodia, Indonesia, Malaysia, Philippines, Singapore,  
92 Thailand and Vietnam) and the neighbouring countries Taiwan and eastern India (Andaman and Nicobar Islands),  
93 and has been named SEATANI (**SEA + Taiwan + Andaman & Nicobar Islands**). This dataset includes both fully  
94 submerged volcanoes and some small volcanic islands, whose submerged portion makes up the majority of the  
95 edifice.

96 We chose this region for several reasons: (i) The whole area is very volcanologically active, but little is known  
97 about its underwater features; (ii) There are millions of people living along the coasts of countries in the region;  
98 (iii) There are infrastructure worth billions of dollars on the seafloor of the target area (e.g. submarine  
99 telecommunication cables) (Wang et al., 2019); And (iv) density of ship traffic in the region is rather high. Based  
100 on this, we 1) characterise the seamount morphology and evolution stage and link them to the *hazard potential*  
101 for seamounts in the region; and 2) highlight areas of high *exposure potential*, in order to motivate and focus  
102 future studies. To accomplish the first goal of characterising seamounts and assess their hazard potential, we  
103 conduct qualitative (seamount type: caldera, guyot, simple cone, composite cone) and quantitative morphological  
104 analysis (height, summit water depth) by using open-access bathymetry datasets (e.g. Gebco 2021; NOAA DEM  
105 Global Mosaic; NOAA Multibeam Bathymetry Mosaic). Additionally, in support of goal 1, we conduct a more  
106 qualitative analysis based on higher resolution bathymetry (Multibeam data from NOAA – 90m/pixel), where we  
107 highlight key seamount features (e.g. submarine landslides, explosive craters, new seamounts) that otherwise  
108 would not be detected from Gebco or the NOAA DEM Global mosaic dataset. Despite the multibeam data having  
109 limited regional coverage (< 10%), they reveal significant seafloor morphologies that can motivate future  
110 quantitative hazard assessments for the region, e.g. numerical hazard modelling. The second goal of highlighting  
111 areas of high exposure potential is achieved through two types of analysis, a quantitative one, where the number  
112 of assets and activities (population, submarine fibre-optic cables, and ship traffic density) within 100 km of  
113 volcanic seamounts is counted; and a semi-quantitative one, where the hazard potential of each seamount is used  
114 to weight the potential areal hazard extent for the entire region of interest. We acknowledge that our work comes  
115 with some limitation, in particular, hazard and exposure potential are not quantified based on geological,  
116 geochemical, tectonic setting, age, and frequency/magnitude information, which are indeed needed for more

117 quantitative studies (a focused discussion is provided later in the text to address these points). However, our intent  
118 with this work is to provide the basic but fundamental elements for future more quantitative studies.

## 119 **2 Methods**

### 120 **2.1 Compilation of SEATANI**

121 Following the seamount definition from Staudigel et al. (2010), here only used for volcanic seamounts, we pre-  
122 compiled a list of seamounts for the region of interest by using three different types of sources: 1) The GVP  
123 database (Global Volcanism Program 2013), where we include seamounts that have erupted from the Pleistocene  
124 (n= 42); 2) The seamount dataset Gevorgian et al. (2023) (n= 405), which is an updated version of the dataset  
125 from Kim and Wessel (2011), where they used statistical methods to differentiate volcanic from non-volcanic  
126 seamounts; and 3) Seamounts from individual studies around the southeast Asian region found in literature (n=  
127 35) (Li et al., 2013; Fan et al., 2017), which have been detected through geophysical methods (i.e. interpretation  
128 of seismic profiles), for a total of 482 entries for the region considered. The definition proposed by Staudigel and  
129 colleagues, however, does not provide specific directions on islands (at what extent a volcanic island is still  
130 considered a seamount), therefore, in order to guarantee reproducibility, we did not include islands whose emerged  
131 volume was > 30% of the total seamount volume, and/or their maximum elevation was > 1000 m a.s.l. (more  
132 details on this methodology are provided in the supplementary information). Following this criterion, none of the  
133 seamounts from the Gevorgian et al. dataset or from the literature studies were removed, however, 16 GVP  
134 volcanoes were excluded (Table S2, Supplementary information), bringing the total to 466 volcanic seamounts.  
135 Despite the choice of 30% and 1000 m a.s.l. was somewhat arbitrary, it allows comparisons across studies and is  
136 in line with our focus here, which is primarily on submarine volcanoes.

137

### 138 **2.2 Bathymetry and exposure datasets**

139 For the bathymetry, we used different datasets of different resolution based on each specific purpose, namely  
140 *Gebco 2021*, *DEM global mosaic* (from NOAA/NCEI), and *Multibeam Bathymetry Mosaic* (from NOAA/NCEI).  
141 *Gebco 2021*, a gridded bathymetric dataset with interval grid of 15 arc-second (450-m/pixel), was used for the  
142 quantitative morphological classification (seamount growth stages) and exposure potential analyses (quantitative  
143 and semi-quantitative). Despite the relatively low/medium resolution, it has global coverage with bathymetry data  
144 deriving from different acquisition methods (Fig. S1, supplementary material), and was clipped for the region of  
145 interest (North: 36.5°, South: -14.3°, West: 82.0°, East: 145.6°). The *DEM global mosaic* is a colour shaded relief  
146 raster file that was exclusively used for the qualitative morphological classification (seamount morphotypes); it  
147 is a seamless bathymetry/topography mosaic that combines DEMs from several sources (e.g. direct and indirect  
148 measurements from ships and satellites) and different resolutions (450-m/pixel or better), with the higher-  
149 resolution DEMs displayed on top of the lower resolution ones (where both available). Since DEMs of different  
150 resolution cannot be extrapolated from this file, but must be downloaded individually, we used the mosaic format  
151 for efficiency and for visualization purposes only. The file was clipped with the same extent as *Gebco 2021*, for  
152 consistency. The *Multibeam Bathymetry Mosaic* is the dataset with the highest resolution among the datasets used  
153 here (90-m/pixel); it is a gridded colour shaded relief, deriving from multibeam survey data collected over the  
154 years (from ~1980 to present). This dataset has a coverage lower than 10% for the region of interest, therefore  
155 was only used for qualitative image analyses, both for the morphological classification (in combination with the

156 DEM Global mosaic) and for the characterization of bathymetric features (see discussion) at some of the locations  
157 enclosed within our study area (where there was data coverage).

158

159 To assess the exposure potential, we used different open-access datasets for population, submarine  
160 communication cables and ship traffic density. We chose these assets for three reasons: (i) Data were available  
161 for quantitative analyses on GIS environment on a regional scale; (ii) We considered them as the assets potentially  
162 more exposed to multiple hazards from a submarine volcanic eruption in a regional perspective (e.g. air traffic  
163 exposure was not quantified here because potentially only exposed to development of a tephra column); And (iii)  
164 such exposure assessment from submarine volcanic eruptions has not been done before, particularly for submarine  
165 communication cables and ship traffic density, which instead have shown to be vulnerable elements to natural  
166 hazards (Ohno et al., 2022; Speidel, 2022). For population estimates, we used LandScan (Sims et al., 2022), which  
167 has a spatial resolution of around 1 km (30 arc-seconds) and has been widely used in previous volcanic hazard  
168 assessments (Reyes-Hardy et al., 2021; Jenkins et al., 2022; Verolino et al., 2022a). For the submarine cables we  
169 used data from *TeleGeography* (last update in 2017); while for the ship traffic density we utilised data from *The*  
170 *World Bank Group*, which reports hourly Automatic Identification Systems (AIS) positions, recorded between  
171 January 2015 and February 2021, at a spatial resolution of 500-m/pixel. This dataset included separate files for  
172 commercial, leisure, passenger, oil and gas, and fishing vessels respectively, however, we used the combined file,  
173 assuming no distinction across vessel types.

174

### 175 **2.3 Volcanic seamounts classification**

176 Volcanic seamounts in the region of interest were classified through two different approaches: 1) Qualitative,  
177 based on seamount shape (i.e. caldera, guyot, simple cone, composite edifice; Fig. 2 and Table 2); and 2)  
178 Quantitative, based on the seamount height and depth that gives a stage of growth, as proposed by Staudigel and  
179 Clague (2010) (Stage 1 to 5: defined in Table 3). Both classifications were obtained from analyses conducted in  
180 GIS environment (Esri® ArcMap 10.7.1). For the qualitative classification, we overlaid the seamount locations  
181 over the bathymetry datasets, and conducted visual image analysis to establish morphotype (Table 2, Fig. 2), using  
182 the highest resolution available for that particular area (NOAA DEM Global Mosaic, 450-m resolution or better,  
183 or NOAA Multibeam data, 90-m resolution). This morphological assessment was conducted by authors A.  
184 Verolino and S.F. Wee, in order to verify consistency and reproducibility, being the classification partially  
185 subjective. For the quantitative method, here we applied the Staudigel and Clague (2010) classification (used here  
186 for the first time for hazard purposes) and obtained the seamount maximum summit height and base water depth  
187 within a 30 x 30 km bounding box of the given seamount location (following Kim and Wessel, 2011). These were  
188 in turn used to assign a stage of growth. Staudigel and Clague (2010) also included Stage 6 seamounts (those  
189 approaching the trench of a subduction zone, or that already started being subducted), however, to maintain the  
190 growth stage classification in a state that is as quantitative as possible, we included them within the low hazard  
191 potential i.e. Stage 1, 2 or 5 seamounts (i.e. deep-water or extinct seamounts). We did this depending on their  
192 height and water depth though we know that the Staudigel and Clague (2010) classification, is not specific on  
193 how close to the subduction trench a seamount must be to be considered stage 6, leaving some subjectivity in the  
194 classification). We used both qualitative and quantitative classification approaches in parallel in order to obtain  
195 different types of information (morphological and growth stage); however, for exposure calculation we refer only  
196 to the quantitative approach (i.e. growth stage).

197  
198

## 2.4 Exposure analysis

199 We conducted two types of exposure potential assessments: 1) A quantitative analysis of population, submarine  
200 communication cables and ship traffic density within 100 km from each seamount; and 2) A semi-quantitative  
201 assessment, through a hazard-weighted seamount density map, to assess what countries are more likely to be  
202 threatened by a seamount within the study region.

203 For the first type of assessment, we chose concentric 100 km radii to include exposure potential of the above-  
204 mentioned assets with the approximation that this would include the more damaging processes from most volcanic  
205 hazards (e.g. tephra fallout, PDCs, sector collapses). This choice is in line with previous regional volcanic threat  
206 studies (Small and Naumann, 2001; Brown et al., 2015), however, we acknowledge that using concentric radii is  
207 an oversimplification of volcanic hazard extents (Jenkins et al., 2022).

208 The semi-quantitative assessment considered the concentration of seamounts, weighted by their hazard rank  
209 (Table 1), and highlights regions of higher hazard potential. We created a weighted seamount density map (Kernel  
210 Density Estimation, KDE), based on the seamount stage of growth, with the assumption that more heavily  
211 weighted seamounts have a greater hazard potential. The KDE was performed on Esri® ArcMap 10.7.1, which  
212 assigns a default bandwidth in function of the input dataset (~626 km in this case), and proven to be reliable in  
213 previous exposure studies (Verolino et al., 2022a). The choice of weight assigned to each growth stage (Table 1)  
214 was based on the Global Historical Tsunami Database (NCEI/WDS), where out of 164 historical volcanic  
215 tsunamis (from 1610 BC to present), 115 were from volcanic seamounts; of these, 78% (n= 90) were from stage  
216 4, 20% (n= 23) from stage 3, and nearly 2% (n= 2) from stage 1, 2, 3 or 5 seamounts (depth of seamount unknown).  
217 In order to compensate the paucity of historical information/data from stages 3, 2, 1 and 5 (shallow or deep),  
218 compared to stage 4 seamounts (partially emerged), and to include volcanic hazards as well, we arbitrarily adjusted  
219 these percentages to 60% and 35% for stage 4 and stage 3 respectively, and the rest was distributed through stage  
220 1, 2 and 5 seamounts (Table 1). Exposure potential was then assessed based on the extent of high-density area  
221 (higher exposure potential:  $> 2.9 \times 10^{-6}$  seamounts/km<sup>2</sup>) obtained from the KDE.

222  
223

224  
225

**Table 1. Seamount hazard ranking based on the Global Historical Tsunami Database (NCEI/WDS) and growth stage from Staudigel and Clague (2010).**

| Seamount hazard ranking | Seamount growth stage | Historical volcanic tsunami occurrence (%) | Hazard weight |
|-------------------------|-----------------------|--------------------------------------------|---------------|
| 1                       | 4                     | 78                                         | 0.6           |
| 2                       | 3                     | 20                                         | 0.35          |
| 3                       | 2                     | 2                                          | 0.03          |
| 4                       | 1                     |                                            | 0.01          |
| 5                       | 5                     |                                            | 0.01          |

226

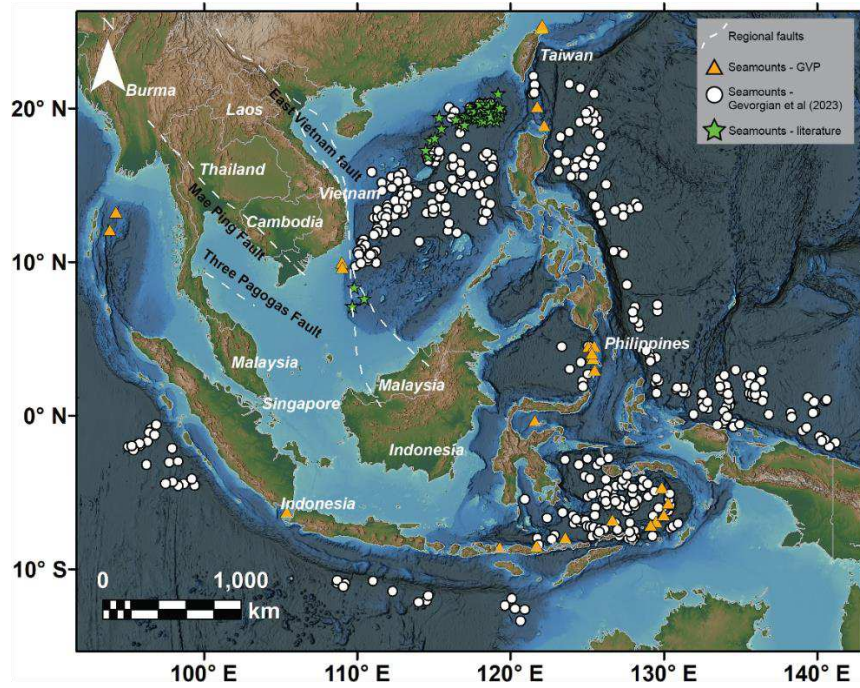

Figure 1. Map of the study area with seamounts locations and major regional faults. Basemap is from NOAA (DEM Global Mosaic).

### 3 Linking seamount morphology and evolution stage with their potential hazards

#### 3.1 Seamount morphotype

Seamount morphology provides hints about the seamount eruptive history. An important consideration is that once seamounts are completely submerged, they do not experience major erosion, retaining most of their original morphological constructive features, unless new eruptions and/or disruptive events such as landslides take place. Therefore, classifying seamounts based on their large-scale morphological features overcomes the resolution issue that we generally have at smaller scales. Below in Table 2 (examples shown in Fig. 2), we provide general guidelines used here for the classification of seamount morphotypes. A background for each morphotype, with a link to their hazard potential and with relevant examples from the literature, is provided in the supplementary information file.

Table 2. Seamount morphotype descriptions.

| Seamount morphotype | Description                                                                                                                                                               |
|---------------------|---------------------------------------------------------------------------------------------------------------------------------------------------------------------------|
| Simple Cone         | Regular-shaped and conical pointy volcanic edifice with only one vent                                                                                                     |
| Composite edifice   | Irregularly shaped volcanic edifice with one or more vents. This morphotype also includes ridges and flank ephemeral cones (e.g. subaqueous portion of a volcanic island) |
| Caldera             | Volcanic edifice with prominent central depression with diameter ~ 4-8 km                                                                                                 |
| Guyot               | Flat-topped volcanic edifice with relatively steep flanks                                                                                                                 |

#### 3.2 Seamount growth stage

Staudigel and Clague (2010) classified seamounts based on their growth stage (Stage 1 to 5), here we use the same approach to first assign a growth stage to the SEATANI seamounts, and then link the growth stage to a given potential hazard(s) that may be common for that particular growth stage. In Table 3 we report the main



247 characteristics for each growth stage (from Staudigel and Clague, 2010), and associated potential hazards (Murch  
 248 et al., 2019a; Paris et al., 2014; Clague et al., 1990; Harders et al., 2014; Verolino et al., 2018, 2019, 2022b;  
 249 Jutzeler et al., 2014; Deardorff et al., 2011; Omira et al., 2016; Newland et al., 2022). A more comprehensive  
 250 analysis of seamount growth stages and their potential hazards is provided in the supplementary information file.

251  
 252

**Table 3. Seamount growth stage and associated potential hazards. Adapted from Staudigel and Clague (2010).**

| <b>Seamount growth stage</b> | <b>Description</b><br>(from Staudigel and Clague, 2010))                                                                                                                                                                                                                                                                | <b>Potential hazards</b><br>(see references in the text)                                                                                                                                                                                                                                                                 |
|------------------------------|-------------------------------------------------------------------------------------------------------------------------------------------------------------------------------------------------------------------------------------------------------------------------------------------------------------------------|--------------------------------------------------------------------------------------------------------------------------------------------------------------------------------------------------------------------------------------------------------------------------------------------------------------------------|
| 1                            | <ul style="list-style-type: none"> <li>● Seamounts 100-1000 m high and &gt; 700 m b.s.l.</li> <li>● &gt; 80% lavas and &lt; 20% pyroclastic deposits</li> </ul>                                                                                                                                                         | <ul style="list-style-type: none"> <li>● Lava flows</li> <li>● Obstacles for navigation (submarines)</li> </ul>                                                                                                                                                                                                          |
| 2                            | <ul style="list-style-type: none"> <li>● Seamounts &gt; 1000 m high and &gt; 700 m b.s.l.</li> <li>● &gt; 80% lavas and &lt; 20% pyroclastic deposits</li> <li>● Developed shallow magma plumbing system (especially the larger ones), potentially leading to flank instability</li> </ul>                              | <ul style="list-style-type: none"> <li>● Lava flows</li> <li>● Subaqueous eruption-fed density currents</li> <li>● Subaqueous eruption column</li> <li>● Pumice rafts</li> <li>● Large gas bubbles</li> <li>● Sector collapse</li> <li>● Tsunamis</li> <li>● Obstacles for navigation (submarines)</li> </ul>            |
| 3                            | <ul style="list-style-type: none"> <li>● Seamounts &lt; 700 m b.s.l.</li> <li>● &gt; 60% pyroclastic deposits</li> <li>● +/- Developed shallow plumbing system (depending on seamount size)</li> <li>● Higher flank instability due to abundance of pyroclastic material making up the seamount</li> </ul>              | <ul style="list-style-type: none"> <li>● Lava flows</li> <li>● Subaqueous eruption-fed density currents</li> <li>● Subaerial PDCs</li> <li>● Subaqueous and subaerial eruption column</li> <li>● Pumice rafts</li> <li>● Sector collapse</li> <li>● Tsunamis</li> <li>● Obstacles for navigation (submarines)</li> </ul> |
| 4                            | <ul style="list-style-type: none"> <li>● Emerged seamounts (&gt; 70 vol% submerged)</li> <li>● &gt; 60% pyroclastic deposits</li> <li>● +/- Developed shallow plumbing system (depending on seamount size)</li> <li>● High flank instability due to abundance of pyroclastic material making up the seamount</li> </ul> | <ul style="list-style-type: none"> <li>● Lava flows</li> <li>● Subaqueous eruption-fed density currents</li> <li>● Subaerial PDCs</li> <li>● Subaerial eruption column</li> <li>● Sector collapse</li> <li>● Tsunamis</li> </ul>                                                                                         |
| 5                            | <ul style="list-style-type: none"> <li>● Flat-topped seamounts (guyots)</li> <li>● Originally emerged seamounts drowned below sea level for erosion and subsidence, and cessation of volcanic activity</li> </ul>                                                                                                       | <ul style="list-style-type: none"> <li>● Obstacles for navigation (submarines)</li> </ul>                                                                                                                                                                                                                                |

253

254 **4 Results**

255 **4.1 Seamount morphology and growth stage**

256 Seamounts in our study were classified based on their morphotype (simple cone, composite edifice, caldera, guyot;  
257 Fig. 2, Table 2) and growth stage (Stage 1 to stage 5; Table 3). Results for their abundance, distribution and  
258 exposure analyses are reported below (Figs. 3-6).

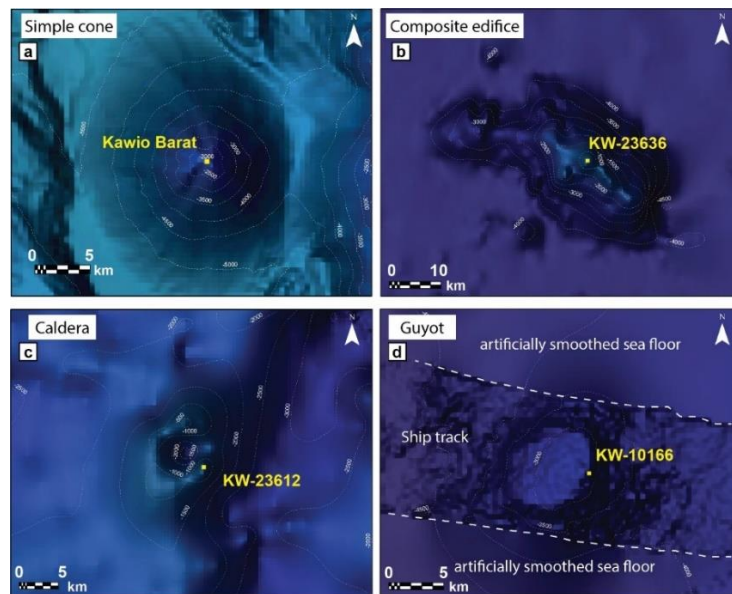

259

260 **Figure 2. Seamount morphotype examples. Note how the seafloor appears smoothed away from ship**  
261 **track measurements due to low density of data points (d). The basemap shown here is from NOAA**  
262 **(DEM Global Mosaic).**

263

264 Of the 466 seamounts in our catalogue, we were able to classify 295 (63%) of them into the four morphotypes;  
265 the remaining 171 (37%) seamounts were not classifiable due to low resolution bathymetry data and/or because  
266 they were too small. The seamounts are dominated by *composite* edifices (n= 255, 54.7%), followed by *simple*  
267 *cones* (n= 29, 6.2%), and *guyots* (n= 7, 1.5%). The morphotype least represented is *calderas*, with only 4 of them  
268 (0.9%). Water depths range from -5739 m b.s.l. (seamount KW-22106 of unknown morphotype; Lat: 13.81°, Lon:  
269 125.58°) to 776 m a.s.l. (Paluweh, simple cone; Lat: -8.32°, Lon: 121.71°), with a *mode* of 2306 m b.s.l., *mean* -  
270 2106 m b.s.l., *median* -2221, and *skewness*= 0.02 (close to symmetric distribution) (Fig. 3c). Water depths within  
271 each morphotype category are relatively variable (Fig. 3d). Simple cones, composite edifices and calderas have a  
272 median of about 2000 m b.s.l., while guyots are mostly closer to sea level (median ~500 m b.s.l.), and unclassified  
273 seamounts cover the entire underwater range (~ 0-5700 m b.s.l.). Despite having a general broad range of water  
274 depths, all the classified seamounts are also represented at relatively shallow water depths (shallower than 1000  
275 m b.s.l.), and this has important implications in terms of volcanic hazard (discussed in later sections). We found  
276 no particular geographic or tectonic setting distribution associated with each morphotype (Fig. 3a).

277 Results from the growth stage analysis (Fig. 3e) show that the majority of the seamounts in the study region  
278 are in their *stage 2* (n= 303), > 1000 m high and > 700 m b.s.l., followed by the shorter but still deep *stage 1* (n=  
279 67), shallower *stage 3* (n= 58), and emerged *stage 4* (n= 31) seamounts. Only 7 seamounts represent *stage 5, flat-*  
280 *topped seamounts*. When comparing morphotype and growth stage distributions (Fig. 3f), simple cones and  
281 composite edifices are found in all growth stages, except for stage 5 (by definition), with composite edifices  
282 dominating across all stages. Calderas are only found within stage 2 (1%) and stage 3 (2%) seamounts, however,

283 when a caldera complex has new cones formed within them or on their rims, we classified them as composite  
 284 edifices (e.g. Krakatau, Indonesia). Undefined seamounts dominate stage 1, however, they decrease in percentage  
 285 towards higher stages seamounts. In terms of geographic/tectonic setting, stage 1 and 2 seamounts dominate  
 286 extensional and/or intraplate domains such as backarc basins (e.g. Banda Sea), and zones undergoing subduction  
 287 (e.g. west of the Sumatra and Java trenches; east of the Philippines trench); while stage 3 and 4 seamounts are  
 288 more common along volcanic arcs (e.g. Banda arc) and on the continental platform in proximity of regional faults  
 289 (east of Vietnam; Fig. 1). An exception is represented by the South China Sea, an intraplate extensional setting,  
 290 where the distribution of all growth stage seamounts is rather uniform.  
 291

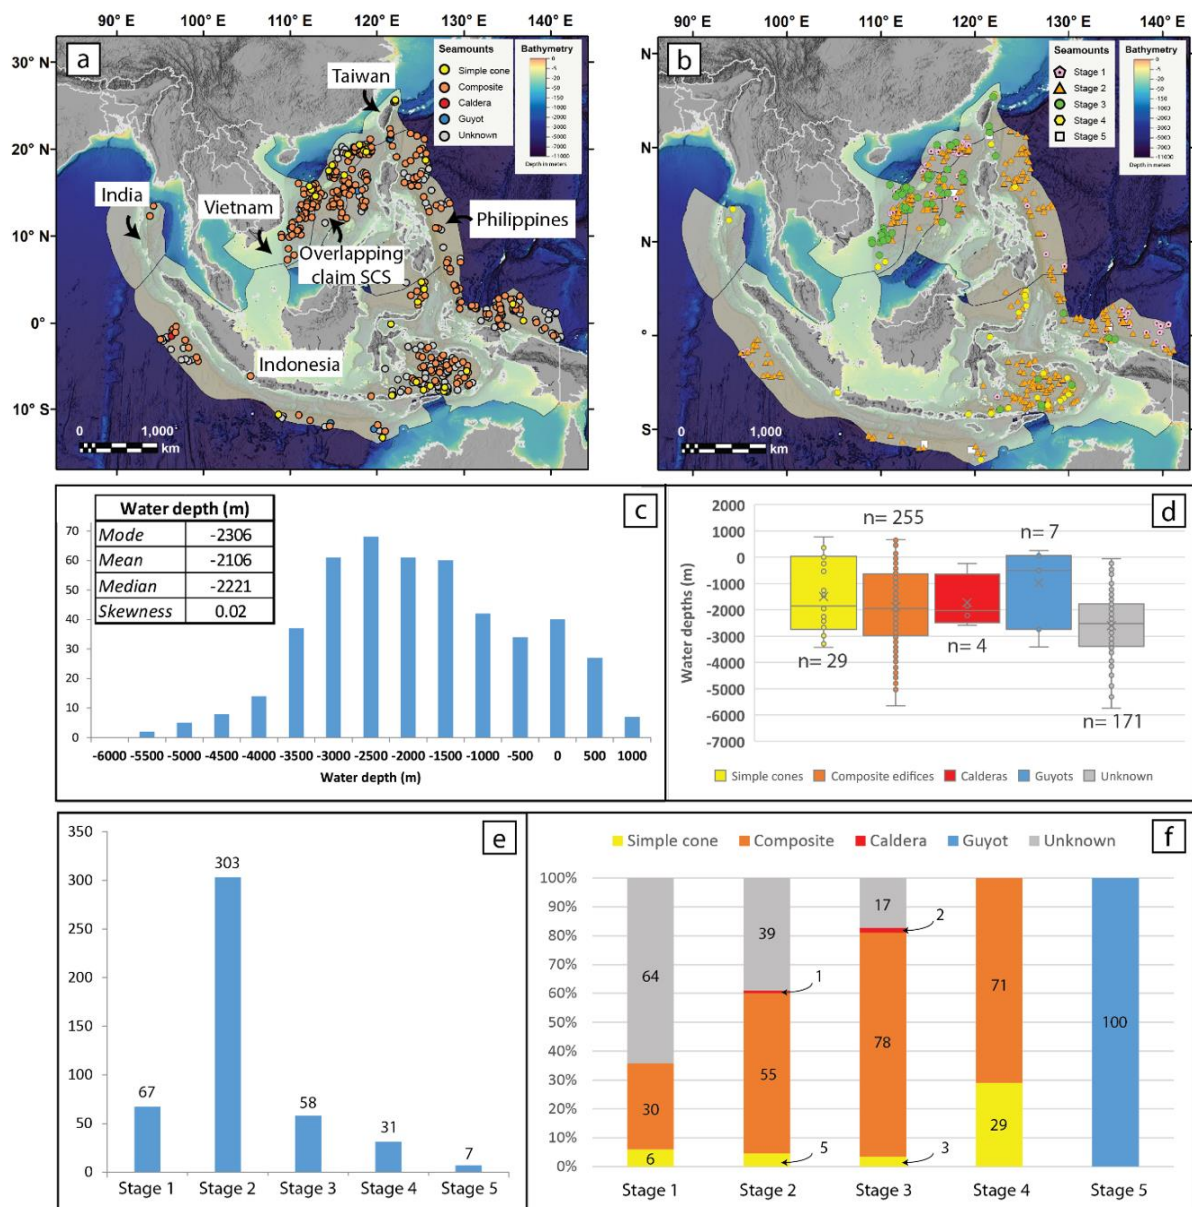

292  
 293 **Figure 3. Results of seamount classifications. Seamounts distribution maps based on their morphotype (a) and**  
 294 **growth stage (b) (basemap is from NOAA - DEM Global Mosaic). Distribution plots of water depths (c), and water depths vs**  
 295 **morphotypes (d). Distribution of seamount growth stages (e), and normalised distribution (%) of seamount**  
 296 **morphotypes within each growth stage (f).**  
 297

298 **4.2 Analysis of ‘Exposure Potential’**

299 **4.2.1 Exposure Potential of assets around seamounts (quantitative)**

300 In this section we assess the exposure potential for population, submarine communication cables and ship traffic  
301 within 100 km radius from each seamount (Figures 4 and 5; Fig. S2 and Table S1). We found that 1.3% of the  
302 volcanoes of our catalogue (n= 6) have more than 1M people living within 100 km from them, with Huapinghsu  
303 (about 40 km north of Taiwan) exposing about 9.6M people, and two nearby volcanoes (Mienhuayu and  
304 Pengchiahsu) having a similarly high level of exposure (8.2M and 6.8M people), with Taipei lying approximately  
305 60 km away. Krakatau volcano, Indonesia, also ranks high, with nearly 8M people exposed (Fig. 4, Fig. S2), many  
306 in Jakarta, which lies ~140 km to the east. About 8% (n= 39) of the seamounts expose between 100k and 1M  
307 people, and these are mostly located within the EEZs of Taiwan, Philippines and Indonesia. There are also a  
308 significant number of seamounts (n= 319) with zero population exposure, mostly located in the central portion of  
309 the northern South China Sea, western Pacific Ocean, and eastern Indian Ocean, and some in the Banda Sea.

310 Exposure for submarine cables has been evaluated in terms of total length of cables within 100 km from each  
311 seamount. About 50% (n= 232) of the seamounts have at least 50 km of submarine cables within their radii, and  
312 approximately 17% of seamounts (n= 78) expose more than 1000 km of cables each. The seamounts with higher  
313 exposure are within the EEZs of Taiwan, Philippines and Vietnam, with Taiwanese volcanoes exposing more than  
314 2500 km of cables each (Fig. 4, Fig. S2).

315 Ship traffic density also shows the highest values around Taiwanese seamounts (Fig. 4, Fig. S2), with the  
316 busiest areas including the Taiwanese strait, western and eastern portions of the northern South China Sea (east  
317 of Vietnam and west of Philippines), Singapore and Malacca Straits, and Gulf of Thailand, with the last three  
318 having zero exposure due to lack of known seamounts nearby. Krakatau also ranks high for ship traffic exposure  
319 (11<sup>th</sup>).

320 In Figure 5, we aggregated exposure to the country level for individual seamount growth stages, and we found  
321 that 5 of the 11 EEZs in the region lie within 100 km of a volcanic seamount (India, Indonesia, Philippines, Taiwan  
322 and Vietnam), in addition to the central portion of the northern South China Sea, which is contended across  
323 different nations (i.e. here referred to as *overlapping claim waters*) and not discussed here. For population, Taiwan  
324 is the country with the highest exposure values (up to nearly 10M people), followed by Indonesia (up to 8M) and  
325 the Philippines (< 1M). For exposure of submarine cables, Taiwan and the Philippines rank the highest (up to  
326 >2,000 km of cables nearby seamounts), followed by Vietnam, and the other EEZs having similar values, with  
327 overall less than ~1,500 km of cables within their maritime borders. For ship traffic density, again, Taiwan  
328 reports the highest exposure, followed by the Philippines, Indonesia, Vietnam and India, with similar values  
329 respectively. When considering the growth stage, besides being the country with the highest exposure values,  
330 Taiwan is also the country with exposure to the seamounts with higher rank (stage 3 and stage 4), and this is  
331 shown for all the assets considered.

332

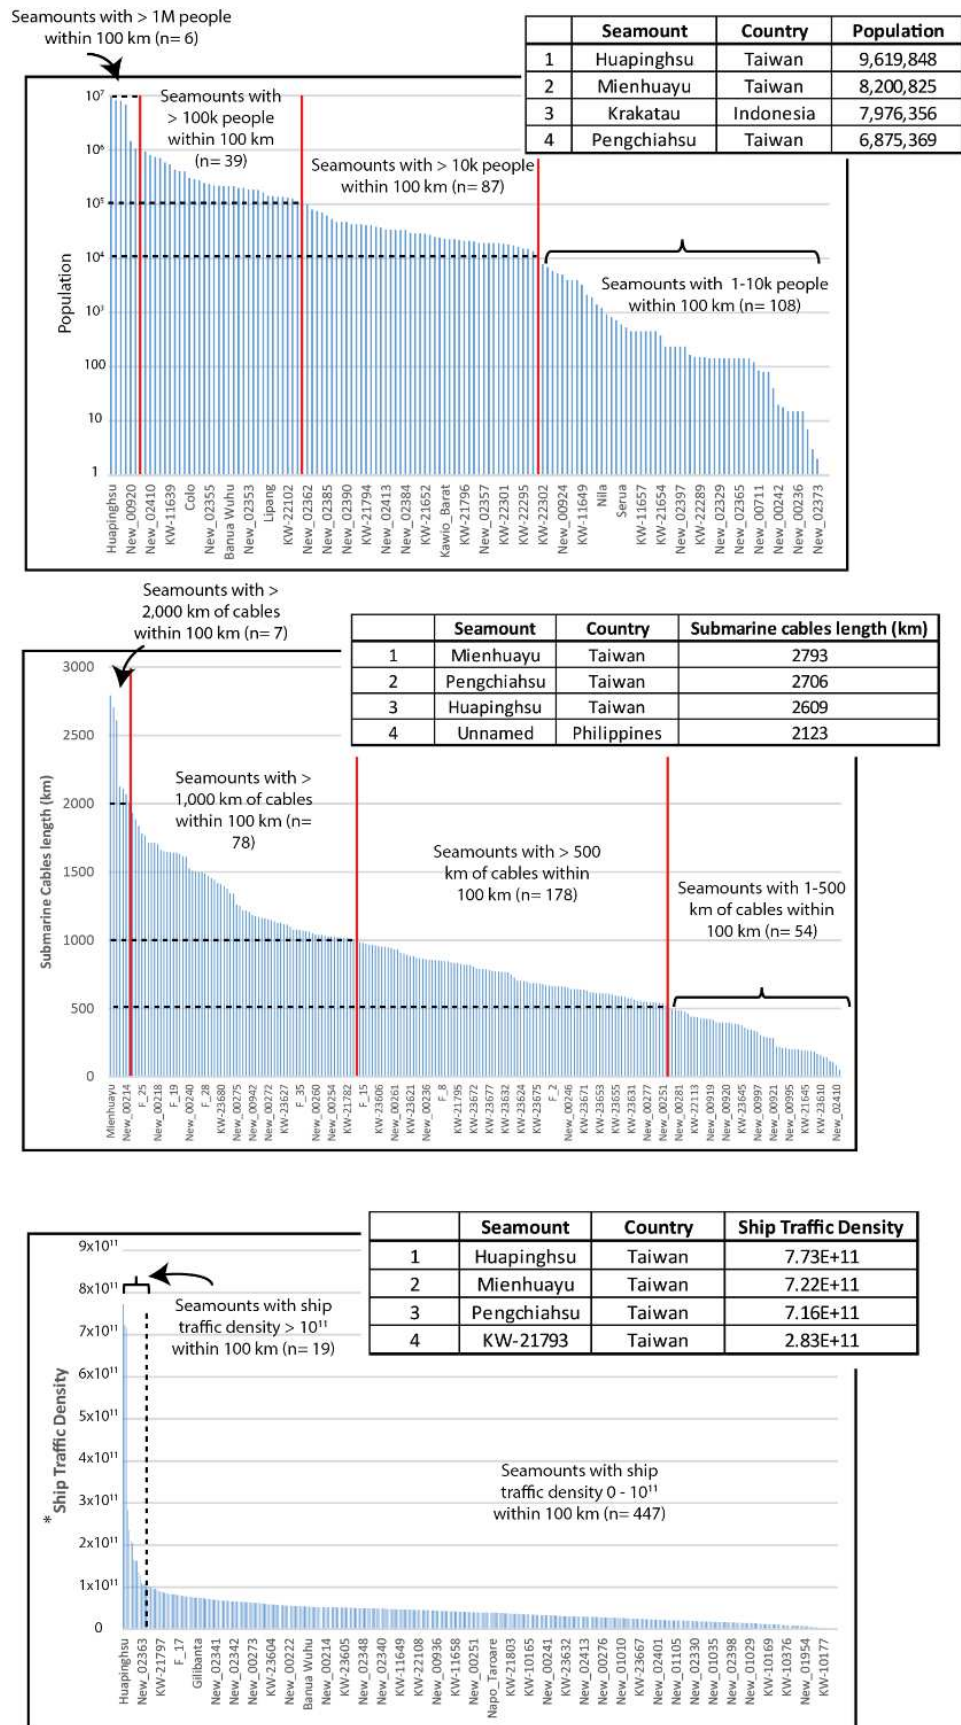

333

334 **Figure 4. Exposure potential for population (top panel), submarine communication cables (middle panel) and ship**  
 335 **traffic density (bottom panel) within 100 km from seamounts in and around SEA. Tables with the top 4 seamounts**  
 336 **for exposure are also reported (full seamounts exposure lists are available as additional material; Table S1).**

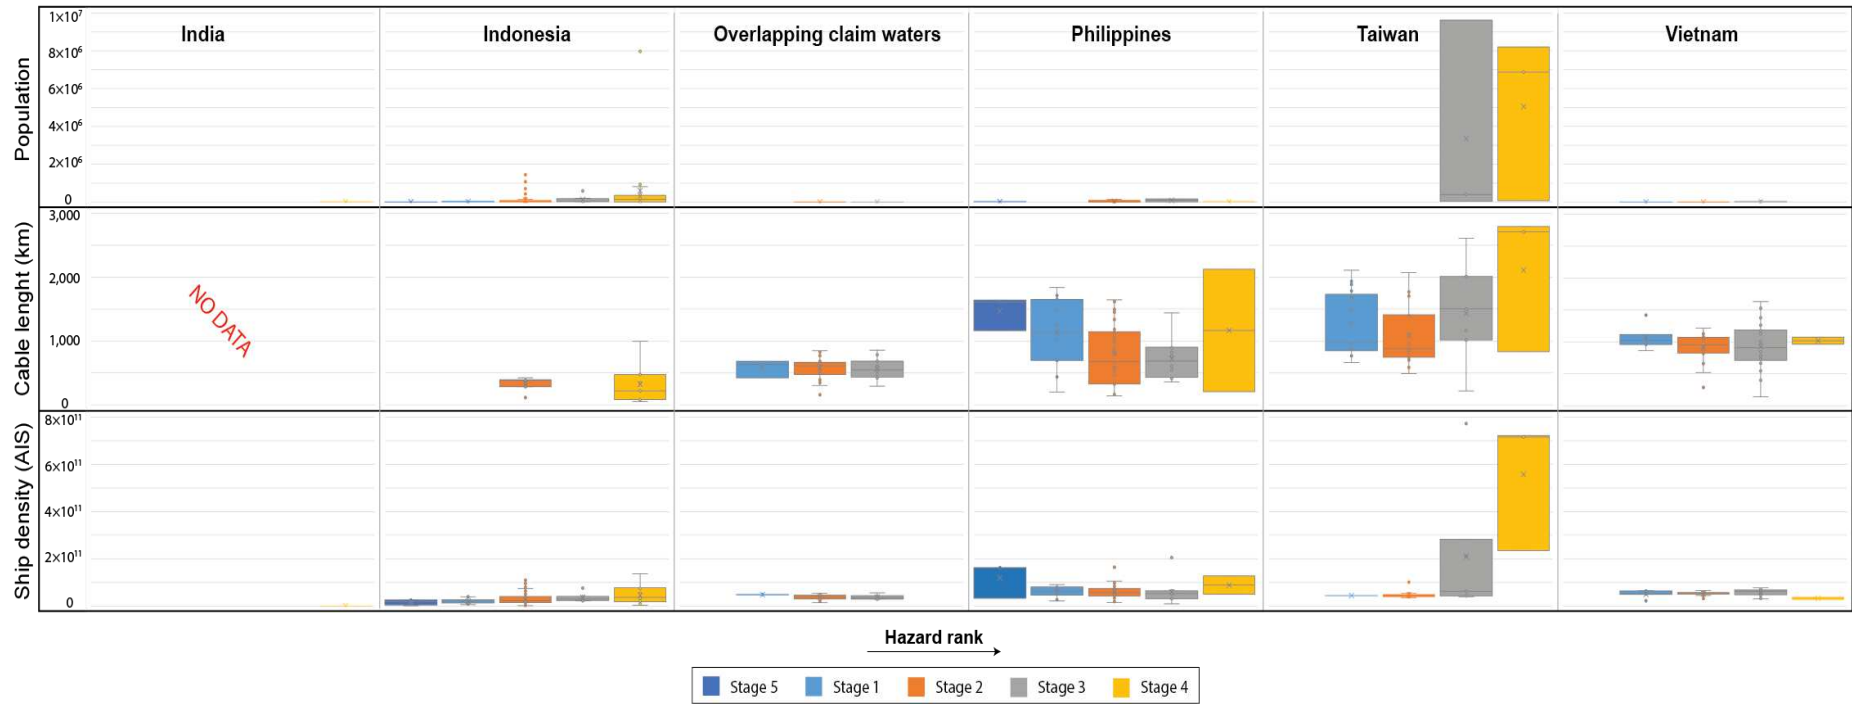

337  
338  
339

Figure 5. Exposure potential by country across all stages (ordered from left to right with increasing hazard rank), for population, submarine cables, and ship traffic density. Note that there is no cable data for India's seamounts

340 **4.2.2. Hazard weighted seamount density (semi-quantitative)**

341 Here we conducted a weighted Kernel Density Estimation (KDE) to understand which regions have higher  
342 potential to produce hazards from a seamount. This estimation is purposely weighted towards the more hazardous  
343 seamounts (Stage 3 and 4) (more details about the weighting process are reported in the methods section). A  
344 sensitivity analysis was run with only stage 3 and 4 seamounts to test the effect of the lower-weighted stage 1, 2  
345 and 5 seamounts, which represent the majority of the seamounts in our study, on the final weighted density map.  
346 Their effect was found to be negligible (Fig. S2, Supplementary material), therefore we proceeded with this  
347 approach by including all seamount stages with a given hazard weight (Table 1). The results (Fig. 6) show that  
348 there are two large regions of interest, the largest is located in the South China Sea, followed by the Banda Sea.  
349 Other areas of interest, but with lower density, include the Celebes Sea, the Halmahera Sea, and the portion of  
350 Pacific Ocean just east of Taiwan and northern Philippines. Countries surrounding the areas with higher weighted  
351 density include southern Vietnam, southern and northern Philippines, and eastern Indonesia (Sulawesi, Maluku,  
352 and Lesser Sunda Islands).

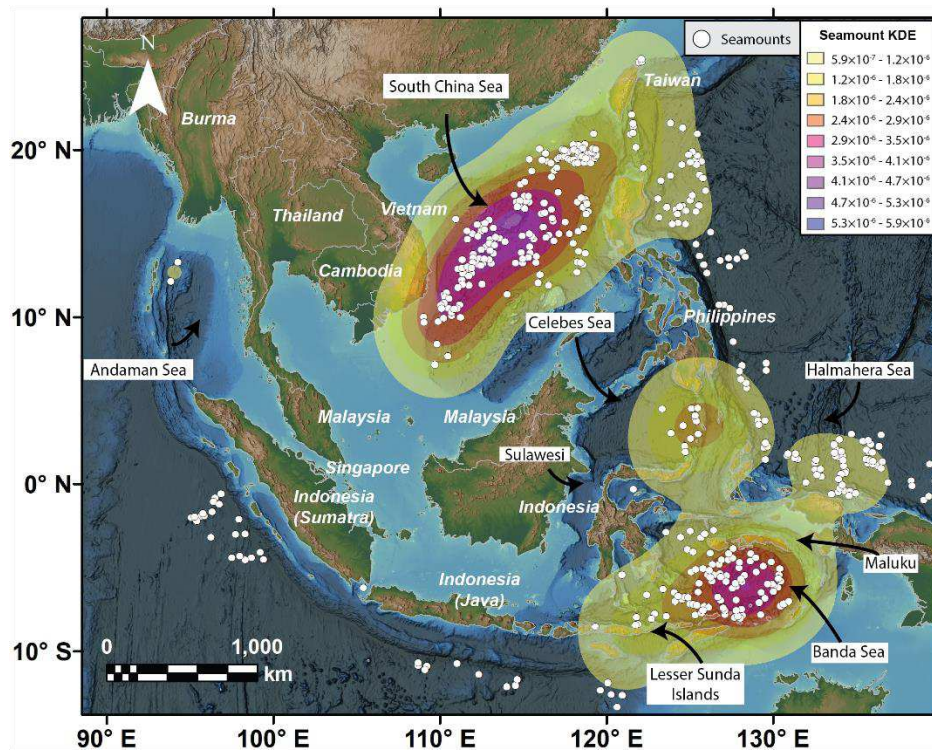

353  
354 **Figure 6. Hazard-weighted seamount density map in the region of interest. In dark**  
355 **purple the area with higher density of seamounts of higher hazard (see Table 1 for**  
356 **hazard weight).**

357 **5 Discussion**

358 **5.1 Potential sources of volcanic and related hazards in Southeast Asia and its surroundings**

359 Our morphological assessment, although we did not consider geological, absolute age, and  
360 frequency/magnitude information in our seamount assessment (see discussion in later sections), can still provide  
361 insights about past and potentially future seamount behaviour. This can be used to narrow down the search of  
362 possible hazardous seamounts to investigate further in future studies as discussed below.

363 Mienhuayu and Pengchiahsu (offshore north of Taiwan), are two stage 4 simple cones, which lie in waters  
364 shallower than 200 m, with their summits just above sea level (16 and 49 m a.s.l. respectively). We can hypothesise

365 that simple cones found in shallow waters in our region of interest are likely relatively young, because the sea  
366 level rose about 120 m over the last ~20k years (Diekmann et al., 2008; Hanebuth et al., 2011). If volcanoes that  
367 are now in shallow water environments were already existing 20k ago, we could assume that they were at least  
368 partially above water, and this would be reflected in their shape (e.g. presence of prominent terraces on the flanks).  
369 Mienhuayu and Pengchiahsu, which have their base at ~200 m b.s.l., and are considered Pleistocene in Age (100  
370 ka or younger: Global Volcanism Program 2013), would be good case studies to test this hypothesis, however,  
371 the current available resolution prevents us from providing reliable inferences at this stage. Focused bathymetric  
372 and/or seismic surveys around these volcanoes would provide key clues about their relative age (older or younger  
373 than the last glacial maximum, 25 ka). This is important for hazard assessment, because Mienhuayu and  
374 Pengchiahsu are 50-60 km of the Taiwanese mainland and are among the volcanoes that rank the highest in the  
375 quantitative exposure potential analysis for all the assets considered (Fig. 4) (more discussion in the following  
376 sections).

377 The Kawio Barat seamount (~100 km south of the Philippines; Lat: 4.68°, Long: 125.09°) is a large simple  
378 cone rising from about 5,500 m b.s.l. up to ~2000 m b.s.l. (stage 2); it is unlikely that such a high seamount was  
379 formed in a single or short-lived eruptive event. Its regular conical shape, its height and the relatively steep slope  
380 angles (up to >30°) suggest a past explosive or mixed explosive/effusive history, as observed at similar cones on  
381 land; therefore, it represents another candidate to attention for future studies.

382 In this study Krakatau has been classified as a composite and stage 4 seamount, even though it is the newest  
383 cone formed as part of a caldera complex. It is well known for the 2018 eruption collapse-tsunami event (Self,  
384 1992), and for the catastrophic eruption of its predecessor in 1883, which produced PDCs and tsunamis, killing  
385 over 30,000 people (Self, 1992). An example of a less known but still potentially hazardous composite and stage  
386 4 seamount in the region is North Kawio, Indonesia (northern portion of the Sangihe volcanic arc; Lat: 4.68°,  
387 Long: 125.47°). This seamount is reported as Pleistocene in the GVP, but no other information about age is  
388 provided. It is a mostly submerged edifice, with multiple peaks above sea level (e.g. Marore, Kawio, and  
389 Kamboreng islands) and several submarine vents, covering a total area of about 1,500 km<sup>2</sup>. These characteristics  
390 (distributed volcanism), besides the unknown and possibly relatively young age, and the relatively close proximity  
391 to mainland southern Philippines (~100 km south), make North Kawio a potential seamount to attention for tephra  
392 and tsunami hazards.

393 In terms of potentially more explosive submarine eruptions, calderas are key morphotypes to consider for the  
394 region. In our classification we identified 4 calderas, 3 of which have their summit at a water depth larger than  
395 ~1,300 m, with 2 of them being deeper than 2,000 m (all stage 2). Some calderas may form due to gradual  
396 subsidence over a longer period of time, hence not associated with any catastrophic explosive event. One key  
397 morphological indicator of either sudden or gradual collapse may be hidden in the intra-caldera slope angles; steep  
398 inner flanks may indicate a sudden sub-vertical movement downward resulting from the magma withdrawal from  
399 a shallow magma chamber. Despite the long-believed concept that explosive volcanic activity is hindered at large  
400 water depths (Cas, 1992), we show in our study that deep calderas with explosive features do exist. Seamount  
401 KW-23612, in the northern South China Sea (Fig. 2c), for example, despite having its rims reaching about 230 m  
402 b.s.l. (stage 3), has the caldera floor at over 2,000 m b.s.l., with inner slope angles up to ~50°. It is unlikely that  
403 such a depression (nearly 2,000 m deep), with such steep caldera walls was formed by gradual subsidence.  
404 Similarly, the recent eruption at the Hunga volcano, was responsible for deepening its caldera floor from an initial



405 depth of about 200 m to about 850 m (Ribo et al., 2023). The eruption, although initiated at shallow water depth,  
406 was responsible for the withdrawal of intra-caldera material up to >800 m through explosive mechanisms, and  
407 this has important implications, once again, about the water depth limit of volcanic explosive eruptions. It is clear  
408 that explosive activity associated with caldera formation can be of rather large magnitude, resulting in high  
409 hazardous scenarios, particularly if this occurs in highly populated areas such as the South China Sea (e.g.  
410 seamounts KW-23612, New-00258) or off the coasts of Indonesia (seamount KW-10401).

411

## 412 **5.2 Potential of multibeam high-resolution image analysis**

413 As part of the seamount characterisation, and where multibeam high-resolution (90-m/pixel) bathymetry data  
414 were available, we searched for morphological features on and around seamounts that may give us clues about  
415 past hazards (examples reported in Figure 7). Note that this information is reported here for discussion purposes  
416 only, rather than for quantitative assessment of frequency and type of these past events because multibeam data  
417 only covers < 10% of the region of interest, which may bias the results.

418 From our investigation, we identified several debris avalanche deposits, landslide scars and slumps, explosive  
419 craters at depth, new potential seamounts, and deposits associated with submarine explosive volcanic activity. In  
420 order to understand the potential of such past hazards, and the impact they would have if they occurred nowadays,  
421 we highlight an example of a large landslide scar and associated deposit near Kawio Barat seamount, in the  
422 Celebes Sea, ~100 km south of Mindanao and 90 km north of Sangihe Island, Indonesia (Fig. 7b). We roughly  
423 estimated the debris avalanche volume from the topographic contours (through Esri@ArcMap™ 10.7.1), which  
424 resulted in a volume of ~14 km<sup>3</sup> of material; the deposit includes visible blocks (i.e. hummocks) up to ~500 m in  
425 diameter, which are typical of massive sector collapses (Violante et al., 2003; Idárraga-García and León, 2019;  
426 Carter et al., 2020). For comparison, the sector collapse of Mt Krakatau, Indonesia, in 2018, was about 0.15 km<sup>3</sup>,  
427 which produced a local tsunami with maximum run-up of up to 14 m, and caused over 430 fatalities and millions  
428 of USD damage (Paris et al., 2020 and references therein). The event considered here is likely two orders of  
429 magnitude larger than the Krakatau event, and although the associated potential tsunami hazard cannot be  
430 compared directly because of bathymetric differences at both sites, the size of this event in the Sangihe arc gives  
431 us an idea of the relative scale.

432 Slumps are generally considered less likely to produce significant tsunamis, however, in some instances they  
433 have been inferred as the main cause of devastating tsunamis, such as the 1998 Papua New Guinea event (Okal  
434 and Synolakis, 2003; Brune et al., 2010). Subaqueous slumps appear as transverse ridges with steep toes and block  
435 of various sizes, as have been observed from bathymetric surveys around Hawaii (Moore et al., 1989), and  
436 differently from debris avalanche, they are not associated with any amphitheatre-like detachment area. An  
437 example is shown in Fig. 7a, where an area of over 100 km<sup>2</sup> of slumped material is highlighted, just north of  
438 seamount New-00919.

439 Explosive craters provide evidence of volcanic hazards; in Figure 7c we report an example from seamount  
440 KW-21797, ~300 km east-southeast of Taiwan and ~400 km northeast of Luzon, which is a composite and stage  
441 2 seamount, and has a prominent topographic relief with a circular depression at the base of its NW side. This  
442 topographic feature is at a water depth of about 4,600 m, has a crater diameter of approximately 1.5 km and is  
443 around 150 m deep. We interpret this structure as a possible explosive crater because of its relatively large crater  
444 diameter and rather regular circular shape, which may have been formed by an individual explosive event. To the  
445 west of this structure, we identified an apron-like morphology extending westward for about 4 km, which is likely

446 the volcanic deposit associated with this explosive structure mantling its flank. We cannot rule out the possibility  
 447 that this structure and associated deposit may be related to effusive activity forming a westward lava flow.  
 448 Evidence of explosive volcanism at water depths  $\geq 1000$  m is not new to geoscientists. Several examples are  
 449 reported in literature, both along volcanic arcs (Murch et al., 2019b), mid-ocean ridges (Sohn et al., 2008), and  
 450 hotspots (Schipper et al., 2010). Additionally, the potential occurrence of explosive deep-sea volcanic eruptions  
 451 has been proved through analogue experiments (Dürig et al., 2020; Newland et al., 2022; Head and Wilson, 2003).

452 In the same area of seamount KW-21797, we identified other possible seamounts (Fig. 7d) that are not reported  
 453 in any official dataset. They present themselves as individual composite edifices or chains of composite edifices  
 454 (at least 3 chains can be recognised, all extending along W-E trends). These potential seamounts vary in height  
 455 from  $< 500$  m to  $\sim 1500$  m, and their summit reaches water depths of  $\sim 5,500$  to  $\sim 4,000$  m b.s.l. Although all these  
 456 seamounts have their summit in deep waters, some of them are higher than 1,000 m (stage 2). We do not include  
 457 them in SEATANI as we cannot be sure that they are volcanic, but they may be worth further investigation.

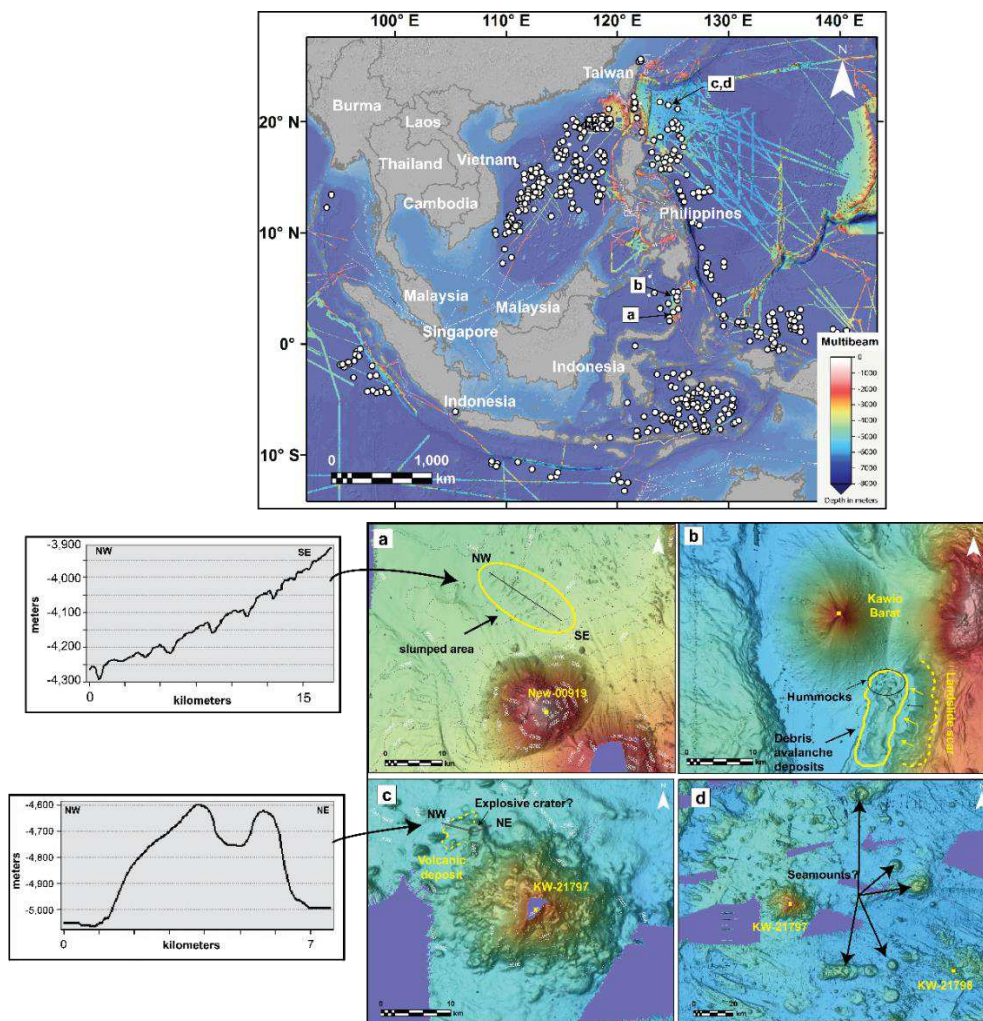

458  
 459 **Figure 7. Map of the study region with multibeam data coverage (top panel), and relevant hazard features**  
 460 **at some of the seamounts investigated, where multibeam data were available (bottom panels, a to d). Two**  
 461 **bathymetric profiles for box a) and c) are also shown.**  
 462

### 463 5.3 Potential areas of interest

464 Our seamount characterisation and exposure potential analyses highlights areas potentially more exposed to  
 465 hazards in case of submarine eruption in and around SEA. Taiwan seems to be the candidate that requires more

466 attention. It ranks high for both exposure analysis types conducted here. It has the highest number of people  
467 exposed, with two stage 4 and one stage 3 seamount (the most hazardous types) just 30-60 km northeast of the  
468 highly populated Taipei District (>9 M people). A submarine eruption at such distances may affect the nearby  
469 Taiwan through tephra falls and tsunamis. Subaqueous landslides, PDCs, or lava flows can damage the dense  
470 submarine cables array both north and south of Taiwan. Both volcanic and tsunami hazards can affect local ship  
471 traffic, which seems to be the densest in the whole region, with key connection between Taiwan and the rest of  
472 the region through eight major ports.

473 Besides Taiwan, if we consider the exposure by number and type of seamount by country (Fig. 5), Indonesia,  
474 Philippines and Vietnam are potentially threatened too. For Indonesia, the well-known Krakatau represents a  
475 hazard for population (~8 M people) and ship traffic, being a key passage to the South China Sea from the southern  
476 Indian Ocean. Eastern Indonesia (Sulawesi, Maluku and Lesser Sunda Island) is mostly exposed to stage 4, stage  
477 3, and stage 2 seamounts. The Philippines is highly exposed as well, with the maximum exposures in the north  
478 (submarine cables, coasts), west (ship traffic) and south (coasts). Vietnam is characterised by high ship traffic  
479 density, with major commercial areas including the Mekong delta and Da Nang port. The Vietnam EEZ encloses  
480 a seamount that erupted in historical time, Ile des Cendres, 1923 (~115 km off the southeast coasts of Vietnam;  
481 Lat: 10.16°, Lon: 109.01). The eruption formed two islands (eroded soon after the eruption and now completely  
482 underwater) and at least another submarine cone (Global Volcanism Program, 2013). There is not much  
483 information about the eruption, but it was thought to be VEI= 2, and a local tsunami along the SE coasts of  
484 mainland Vietnam was also reported (Vu, 2008; Dai Dien, 2010). To our knowledge, there is no detailed study of  
485 the Ile Des Cendres complex, despite it representing the latest episode of submarine volcanism in the region and  
486 having a distributed nature (formation of several vents), which increases the area from which a potential eruption  
487 may occur, hence the hazard.

488 In areas of low seamount density and apparent lower hazard - for example the Indian EEZ (Andaman Sea,  
489 between Sumatra and Burma), which contains just two seamounts, both stage 4 - tsunami can potentially affect  
490 wider areas, such as the coasts of Thailand, Malaysia, Burma, Indonesia (Sumatra), India and, depending on the  
491 magnitude of the event, the coast of Singapore through the Malacca Strait. One of these seamounts is Barren  
492 Island, which shows past evidence of sector collapse (Chandrasekharam et al., 2009). Given the tectonic setting  
493 of these two volcanoes (submarine continuation of the Indonesian volcanic arc), we may expect the presence of  
494 other seamounts in this area not currently charted, hence potential increased hazard extent.

495

### 496 **5.3.1 The geodynamic context for SEATANI seamounts**

497 We noted that geology, absolute age, and eruption frequency/magnitude, were not taken into account for our  
498 hazard-exposure potential assessment, because of the lack of information for most of the seamounts in the region.  
499 Notwithstanding, in this section we discuss the geodynamic context of the SEATANI seamounts from a regional  
500 perspective, with a particular focus on the two regions that we found to host the highest number of stage 3 and 4,  
501 hence potentially more hazardous, seamounts: the South China Sea and the Banda Sea.

502 There are a number of seamounts (Fig. 6) in proximity to the Indonesian and Philippines trenches that show  
503 zero to very low weighted density, and this reflects their relatively low hazard potential. Seamounts in these  
504 particular tectonic settings are likely millions of years old and no longer active, being at the end of their cycle and  
505 approaching a subduction zone (Staudigel and Clague, 2010). It is likely that also some seamounts in the high

506 weighted density regions of the South China Sea and Banda Sea may have been extinct for millions of years,  
507 however, these areas represent different tectonic settings, and must be discussed separately.

508 The South China Sea is the result of a multiphase continental rifting and breakup from the Eocene to the  
509 Miocene (e.g. Franke, 2013). Many studies provide evidence for extensive intraplate volcanism in the South China  
510 Sea following the end of the continental rifting (e.g. Xia et al., 2018; Gao et al., 2019; Zhao et al., 2020), with  
511 abundance of Late Cenozoic OIB-type basalts, inferred to be linked to a mantle plume (Yang et al., 2019). A more  
512 recent study identified widespread and partially still ongoing hydrothermal activity in the northern South China  
513 Sea, thought to be associated with magma intrusion (Zhao et al., 2021). On the southwestern edge of the South  
514 China Sea, east of southern Vietnam, there is a submarine volcano that erupted in historical times, Ile des Cendres,  
515 1923. The volcano is located in proximity to a major regional fault, the East Vietnam Fault (Hall and Morley,  
516 2004; Li et al., 2013) (Fig. 1); other major faults exist in the region (Mae Ping Fault and Three Pagogas Fault  
517 (Hall and Morley, 2004; Li et al., 2013), Fig. 1), and others may not be mapped, together with volcanoes in their  
518 proximity. Therefore, despite the intraplate setting, volcanism in the South China Sea may still play a role for  
519 future hazardous scenarios for the region.

520 The Banda Sea, on the other hand, results from more complex dynamics. This area was formed by the initial  
521 collision between the Australian and the Banda arc (which was already active from ~12 Ma, (Yang et al., 2021),  
522 and subsequent slab rollback, which created the extensional Banda Sea backarc basin (Wei et al., 2023). Therefore,  
523 seamounts in this area belong to at least two different formation mechanisms, arc volcanism and backarc  
524 extensional volcanism. If we consider the seamount growth stage for this area (Fig. 3b), we notice that that  
525 majority of seamounts along the Banda arc are stage 3 and 4, while the seamounts in the central portion of the  
526 Banda Sea basin are stage 2. Most of these stage 2 seamounts are likely as old or older than 3 Ma, given the  
527 inference that volcanism in the Sunda backarc basin ceased about 3 Ma (Honthaas et al., 1998), however, some  
528 of the Sunda arc seamounts (i.e. Banda Api, Serua, Nila, and Teon) are reported in the GVP, and erupted in recent  
529 times (within the last ~120 years). Other seamounts are found along this arc and include a stage 3 (New-02400)  
530 and a stage 4 (New-02393) seamount. Although we lack geological information from these two volcanoes, their  
531 tectonic setting and proximity to other active seamounts may suggest that they were active in relatively recent  
532 times and may still present a potential threat for the region in case of eruption.

533

#### 534 **5.4 Limitations and future goals**

535 A major limitation of this study is the fact that we characterise the hazard potential from seamounts solely based  
536 on morphological (morphotype) and structural information (i.e. water depths, heights), with the high likelihood  
537 of including volcanoes that might have been inactive for millions of years, in turn resulting in an overestimation  
538 of the hazard potential. Despite this, the present study is relevant because it provides the elements to narrow down  
539 the research for future hazard studies from submarine volcanic activity in and around SEA.

540 When it comes to explosive versus effusive behaviour of a given volcano, hence the type of hazards it can  
541 produce, magma composition is a key aspect to consider. In subaerial environments, more silicic magmas are  
542 generally more explosive than basaltic magmas. However, in subaqueous environments the interaction between  
543 external water and magma is often considered the leading trigger of the explosivity of that particular volcano (e.g.  
544 Verolino et al., 2018, 2019). Many pioneer studies on the topic proved that this explosive interaction is more  
545 likely to occur with basaltic magmas (e.g. Wohletz, 1983, 1986; Büttner and Zimanowski, 1998), nevertheless, it  
546 also occurs with more silicic compositions (e.g. Austin-Erickson et al., 2008; Dürig et al., 2020). Magma

547 composition was not accounted for in our assessment of hazard-exposure potential for two main reasons: 1) Only  
548 GVP seamounts have known composition (despite it could be assumed for some of the seamounts based on their  
549 tectonic setting); And 2) explosivity in subaqueous settings have been observed/inferred across all compositional  
550 domains, hence producing similar hazards regardless of composition. However, one difference is the production  
551 of pumice rafts in silicic eruptions (e.g. Havre, 2012; Fukutoku-Oka-no-Ba, 2021; Carey et al., 2014; Maeno et  
552 al., 2022), which is not expected for basaltic eruptions. Magma composition, eruption dynamics, and  
553 environmental factors that affect hazard extent, distribution and intensity, such as wind conditions or bathymetry,  
554 should be accounted for in future quantitative hazard studies for the region, once more information is made  
555 available.

556 Two main issues about the study of seamounts globally and regionally are that 1) the detection from space is  
557 limited within continental margins, and 2) the currently available bathymetry resolution is not enough to allow a  
558 comprehensive morphological characterisation of seamounts. As a result, we end up with large areas without  
559 seamounts (e.g. Sunda shelf), and many unclassified seamounts (n= 171). The general lack of seamounts on the  
560 Sunda shelf is questionable. Ile des Cendres and Veteran, besides other volcanoes not reported in this study  
561 because not in line with the definition of seamount used here (e.g. Ly Son group, Table S2), are in close proximity  
562 with a major regional fault, the East Vietnam Fault. Since this fault extends across the central-eastern portion of  
563 the Sunda shelf (all the way south to Borneo inland) (Li et al., 2013), it would not be surprising to have other  
564 volcanoes along or near to this fault zone. Other major faults mapped on the Sunda shelf include the Wang Chao  
565 (Hall and Morley, 2004) and Three Pagogas faults (Li et al., 2013), but no seamount is known to exist around  
566 these areas. The number and type of seamounts potentially not mapped and not considered for this study, may  
567 bias our results, particularly with regards to the KDE assessment. Potentially, the threat to countries not currently  
568 considered exposed, e.g. Singapore, is much greater than currently appreciated, because of the lack of continental  
569 shelf mapped seamounts. However, once again, we emphasize that here we did not produce any volcanic hazard  
570 maps for the region, but rather conducted a simple but necessary assessment of hazard and exposure potential,  
571 highlighting seamounts and areas of interest that can be the focus for more-in-depth studies.

572 For the quantitative exposure analysis, we used a 100 km radius around each seamount to indicate areas that  
573 may be impacted by volcanic activity. However, concentric radii, despite used in previous hazard studies, are not  
574 a strong approximation of how volcanic hazards behave (Jenkins et al., 2022): some hazards may affect areas  
575 smaller (e.g. lava flows, PDCs) or larger than the 100 km radius (e.g. tephra fall, pumice rafts).

576 Another limitation regards the exact location of submarine communication cables and how many people rely  
577 on this technology. The communication companies provide station to station information, which means that the  
578 exact path of each cable may not be as reported, and this probably partially affects our exposure results.  
579 Additionally, all countries in our study region depend on submarine cables for internet use, which translates into  
580 over 600 million of people in the region, however, the cable length analysed here does not give a direct information  
581 on the potential impact from a submarine volcanic eruption, which would be provided, for example, by the exact  
582 number of people that rely on specific cables per country. Despite this limitation, the direct relationship of  
583 seamount and cable density in some areas (northern South China Sea, Luzon Strait, East China Sea) is rather  
584 obvious (Fig. S2), and should be accounted for with regards to future cable installations in the region.

585

586 The above limitations can be overcome in different ways. First of all, we would need to improve our collaborative  
587 effort with private and government agencies, which may have seismic and bathymetry data that may improve our  
588 understanding of volcanic hazards from submarine volcanoes in the region. Second, we can partially improve the  
589 existing bathymetry datasets, by combining direct bathymetric information from Gebco and from local nautical  
590 charts (Felix et al., 2022), this will help with a better regional seamount characterisation, hazard assessment, and  
591 eventually hazard modelling and impact analysis at key locations. Third, we will use new satellite altimetry data  
592 of the sea surface, which will be made available from NASA in 2023 through the SWOT (Surface Water and  
593 Ocean Topography) mission, which was launched in December 2022. These new data will provide unprecedented  
594 resolutions of the sea surface, which in turn will be used to estimate location of smaller seamount than those  
595 currently detectable from satellite-derived methods, at a global scale. These data will be combined with the  
596 bathymetry data for more comprehensive analyses of hazard. Lastly, the results reported in this work, in addition  
597 to new data, will provide an evidence base for more focused investigations to be conducted at potentially high  
598 threatening seamounts (including sampling through Remotely Operated Vehicles, and later laboratory analysis  
599 for a complete characterisation). This will serve countries across the region to become more prepared and resilient  
600 against submarine volcanic hazards.

## 601 **6 Conclusions**

602 Seamounts are an understudied and potentially silent threat for human populations and infrastructure. Despite the  
603 global identification of about 35,000 seamounts (Gevorgian et al., 2023), only a few of them are thoroughly  
604 studied and monitored (e.g. Deardorff et al., 2011; Caress et al., 2012; Carey et al., 2014; Berthod et al., 2021).  
605 We conducted a seamount characterisation and associated hazard-exposure potential assessment on a regional  
606 scale for SEA and surrounding areas, through the SEATANI dataset, which provides the basis for more focused  
607 investigations of hazards for the region in the near future at key locations. Our results show that composite and  
608 stage 2 seamounts are the most abundant in the region, however, stage 3 and stage 4 seamounts (simple, composite  
609 and calderas) are the most important for hazard potential and numbers of people, lengths of cable and density of  
610 shipping exposed. Taiwan is the country with the highest total exposure potential (across all exposure types)  
611 within 100 km of volcanic seamounts, followed by Indonesia, Philippines and Vietnam. The hazard-weighted  
612 seamount density assessment highlights two main areas of interest: the northern South China Sea and the Banda  
613 Sea. Any volcanic and related hazards (e.g. tsunamis), if generated in these areas, will potentially affect the coasts  
614 of Southern Taiwan, northern and southern Philippines, Vietnam and eastern Indonesia.

615 This work represents the first step towards understanding the threat that submarine volcanoes pose to  
616 populations and infrastructure in and around SEA. The integration of new bathymetry, seismic and satellite-  
617 derived altimetry data (i.e. SWOT mission) will shed more light on the potential of these volcanoes and enhance  
618 awareness, preparedness and resilience for the countries surrounding these waters.

## 619 **Data availability**

620 Data are available in the supplementary material files and in the public data repository of NTU  
621 (<https://researchdata.ntu.edu.sg/privateurl.xhtml?token=820ea7c9-4ff4-48f8-8e8b-98cd4ffe01f8>)

622 **References**

- 623 Austin-Erickson, A., Büttner, R., Dellino, P., Ort, M. H., and Zimanowski, B.: Phreatomagmatic explosions of  
624 rhyolitic magma: Experimental and field evidence, *J. Geophys. Res.*, 113, B11201,  
625 <https://doi.org/10.1029/2008JB005731>, 2008.
- 626 Berthod, C., Médard, E., Bachèlery, P., Gurioli, L., Di Muro, A., Peltier, A., Komorowski, J.-C., Benbakkar, M.,  
627 Devidal, J.-L., Langlade, J., Besson, P., Boudon, G., Rose-Koga, E., Deplus, C., Le Friant, A., Bickert, M.,  
628 Nowak, S., Thion, I., Burckel, P., Hidalgo, S., Kaliwoda, M., Jorry, S. J., Fouquet, Y., and Feuillet, N.: The  
629 2018-ongoing Mayotte submarine eruption: Magma migration imaged by petrological monitoring, *Earth and  
630 Planetary Science Letters*, 571, 117085, <https://doi.org/10.1016/j.epsl.2021.117085>, 2021.
- 631 Brown, S. K., Sparks, R. S. J., and Jenkins, S. F.: Global distribution of volcanic threat, in: *Global Volcanic  
632 Hazards and Risk*, edited by: Loughlin, S. C., Sparks, S., Brown, S. K., Jenkins, S. F., and Vye-Brown, C.,  
633 Cambridge University Press, 359–370, <https://doi.org/10.1017/CBO9781316276273.025>, 2015.
- 634 Brune, S., Babeyko, A. Y., Gaedicke, C., and Ladage, S.: Hazard assessment of underwater landslide-generated  
635 tsunamis: a case study in the Padang region, Indonesia, *Nat Hazards*, 53, 205–218,  
636 <https://doi.org/10.1007/s11069-009-9424-x>, 2010.
- 637 Büttner, R. and Zimanowski, B.: Physics of thermohydraulic explosions, *Phys. Rev. E*, 57, 5726–5729,  
638 <https://doi.org/10.1103/PhysRevE.57.5726>, 1998.
- 639 Caress, D. W., Clague, D. A., Paduan, J. B., Martin, J. F., Dreyer, B. M., Chadwick, W. W., Denny, A., and  
640 Kelley, D. S.: Repeat bathymetric surveys at 1-metre resolution of lava flows erupted at Axial Seamount in April  
641 2011, *Nature Geosci*, 5, 483–488, <https://doi.org/10.1038/ngeo1496>, 2012.
- 642 Carey, R. J., Wysoczanski, R., Wunderman, R., and Jutzeler, M.: Discovery of the Largest Historic Silicic  
643 Submarine Eruption, *Eos, Transactions American Geophysical Union*, 95, 157–159,  
644 <https://doi.org/10.1002/2014EO190001>, 2014.
- 645 Carter, G. D. O., Cooper, R., Gafeira, J., Howe, J. A., and Long, D.: Morphology of small-scale submarine mass  
646 movement events across the northwest United Kingdom, *Geomorphology*, 365, 107282,  
647 <https://doi.org/10.1016/j.geomorph.2020.107282>, 2020.
- 648 Cas, R. A. F.: Submarine volcanism; eruption styles, products, and relevance to understanding the host-rock  
649 successions to volcanic-hosted massive sulfide deposits, *Economic Geology*, 87, 511–541,  
650 <https://doi.org/10.2113/gsecongeo.87.3.511>, 1992.
- 651 Chadwick, W. W., Cashman, K. V., Embley, R. W., Matsumoto, H., Dziak, R. P., de Ronde, C. E. J., Lau, T. K.,  
652 Dearthoff, N. D., and Merle, S. G.: Direct video and hydrophone observations of submarine explosive eruptions  
653 at NW Rota-1 volcano, Mariana arc: SUBMARINE EXPLOSIVE ERUPTIONS AT NW ROTA-1, *J. Geophys.  
654 Res.*, 113, <https://doi.org/10.1029/2007JB005215>, 2008.
- 655 Chandrasekharam, D., Santo, A. P., Capaccioni, B., Vaselli, O., Alam, M. A., Manetti, P., and Tassi, F.:  
656 Volcanological and petrological evolution of Barren Island (Andaman Sea, Indian Ocean), *Journal of Asian Earth  
657 Sciences*, 35, 469–487, <https://doi.org/10.1016/j.jseaes.2009.02.010>, 2009.
- 658 Clague, D. A., Holcomb, R. T., Sinton, J. M., Detrick, R. S., and Torresan, M. E.: Pliocene and Pleistocene alkalic  
659 flood basalts on the seafloor north of the Hawaiian islands, *Earth and Planetary Science Letters*, 98, 175–191,  
660 [https://doi.org/10.1016/0012-821X\(90\)90058-6](https://doi.org/10.1016/0012-821X(90)90058-6), 1990.
- 661 Clague, D. A., Paduan, J. B., Caress, D. W., Thomas, H., Chadwick Jr., W. W., and Merle, S. G.: Volcanic  
662 morphology of West Mata Volcano, NE Lau Basin, based on high-resolution bathymetry and depth changes,  
663 *Geochemistry, Geophysics, Geosystems*, 12, <https://doi.org/10.1029/2011GC003791>, 2011.
- 664 Clague, D. A., Dreyer, B. M., Paduan, J. B., Martin, J. F., Chadwick, W. W., Caress, D. W., Portner, R. A.,  
665 Guilderson, T. P., McGann, M. L., Thomas, H., Butterfield, D. A., and Embley, R. W.: Geologic history of the  
666 summit of Axial Seamount, Juan de Fuca Ridge, *Geochemistry, Geophysics, Geosystems*, 14, 4403–4443,  
667 <https://doi.org/10.1002/ggge.20240>, 2013.

- 668 Dai Dien, L.: Overview on tsunami risk evaluation and NPP project in Vietnam. 1st Kawashiwazaki International  
669 Symposium on Seismic Safety of Nuclear Installations, 24–26 November 2010, NIIT, Niigata, Japan  
670 ([http://www.nsr.go.jp/archive/jnes/seismic-symposium10/presentationdata/3\\_sessionB/B-09.pdf](http://www.nsr.go.jp/archive/jnes/seismic-symposium10/presentationdata/3_sessionB/B-09.pdf)), 2010.
- 671 Dearthoff, N. D., Cashman, K. V., and Chadwick, W. W.: Observations of eruptive plume dynamics and  
672 pyroclastic deposits from submarine explosive eruptions at NW Rota-1, Mariana arc, *Journal of Volcanology and  
673 Geothermal Research*, 202, 47–59, <https://doi.org/10.1016/j.jvolgeores.2011.01.003>, 2011.
- 674 Diekmann, B., Hofmann, J., Henrich, R., Fütterer, D. K., Röhl, U., and Wei, K.-Y.: Detrital sediment supply in  
675 the southern Okinawa Trough and its relation to sea-level and Kuroshio dynamics during the late Quaternary,  
676 *Marine Geology*, 255, 83–95, <https://doi.org/10.1016/j.margeo.2008.08.001>, 2008.
- 677 Dürig, T., White, J. D. L., Murch, A. P., Zimanowski, B., Büttner, R., Mele, D., Dellino, P., Carey, R. J., Schmidt,  
678 L. S., and Spitznagel, N.: Deep-sea eruptions boosted by induced fuel–coolant explosions, *Nat. Geosci.*, 13, 498–  
679 503, <https://doi.org/10.1038/s41561-020-0603-4>, 2020.
- 680 Dziak, R. P., Bohnenstiehl, D. R., Baker, E. T., Matsumoto, H., Caplan-Auerbach, J., Embley, R. W., Merle, S.  
681 G., Walker, S. L., Lau, T.-K., and Chadwick Jr., W. W.: Long-term explosive degassing and debris flow activity  
682 at West Mata submarine volcano, *Geophysical Research Letters*, 42, 1480–1487,  
683 <https://doi.org/10.1002/2014GL062603>, 2015.
- 684 Embley, R. W., Chadwick, W. W., Baker, E. T., Butterfield, D. A., Resing, J. A., de Ronde, C. E. J., Tunnicliffe,  
685 V., Lupton, J. E., Juniper, S. K., Rubin, K. H., Stern, R. J., Lebon, G. T., Nakamura, K., Merle, S. G., Hein, J. R.,  
686 Wiens, D. A., and Tamura, Y.: Long-term eruptive activity at a submarine arc volcano, *Nature*, 441, 494–497,  
687 <https://doi.org/10.1038/nature04762>, 2006.
- 688 Fan, C., Xia, S., Zhao, F., Sun, J., Cao, J., Xu, H., and Wan, K.: New insights into the magmatism in the northern  
689 margin of the South China Sea: Spatial features and volume of intraplate seamounts: INTRAPLATE  
690 SEAMOUNTS IN THE SCS, *Geochem. Geophys. Geosyst.*, 18, 2216–2239,  
691 <https://doi.org/10.1002/2016GC006792>, 2017.
- 692 Felix, R. P., Hubbard, J. A., Bradley, K. E., Lythgoe, K. H., Li, L., and Switzer, A. D.: Tsunami hazard in Lombok  
693 and Bali, Indonesia, due to the Flores back-arc thrust, *Nat. Hazards Earth Syst. Sci.*, 22, 1665–1682,  
694 <https://doi.org/10.5194/nhess-22-1665-2022>, 2022.
- 695 Feuillet, N., Jorry, S., Crawford, W. C., Deplus, C., Thinon, I., Jacques, E., Saurel, J. M., Lemoine, A., Paquet,  
696 F., Satriano, C., Aiken, C., Foix, O., Kowalski, P., Laurent, A., Rinnert, E., Cathalot, C., Donval, J.-P., Guyader,  
697 V., Gaillot, A., Scalabrin, C., Moreira, M., Peltier, A., Beauducel, F., Grandin, R., Ballu, V., Daniel, R., Pelleau,  
698 P., Gomez, J., Besançon, S., Geli, L., Bernard, P., Bachelery, P., Fouquet, Y., Bertil, D., Lemarchand, A., and  
699 Van der Woerd, J.: Birth of a large volcanic edifice offshore Mayotte via lithosphere-scale dyke intrusion, *Nat.  
700 Geosci.*, 14, 787–795, <https://doi.org/10.1038/s41561-021-00809-x>, 2021.
- 701 Franke, D.: Rifting, lithosphere breakup and volcanism: Comparison of magma-poor and volcanic rifted margins,  
702 *Marine and Petroleum Geology*, 43, 63–87, <https://doi.org/10.1016/j.marpetgeo.2012.11.003>, 2013.
- 703 Gao, J., Bangs, N., Wu, S., Cai, G., Han, S., Ma, B., Wang, J., Xie, Y., Huang, W., Dong, D., and Wang, D.: Post-  
704 seafloor spreading magmatism and associated magmatic hydrothermal systems in the Xisha uplift region,  
705 *northwestern South China Sea*, *Basin Res*, 31, 688–708, <https://doi.org/10.1111/bre.12338>, 2019.
- 706 Gevorgian, J., Sandwell, D. T., Yu, Y., Kim, S., and Wessel, P.: Global Distribution and Morphology of Small  
707 Seamounts, *Earth and Space Science*, 10, e2022EA002331, <https://doi.org/10.1029/2022EA002331>, 2023.
- 708 Global Volcanism Program: Global Volcanism Program, 2013 (19 June 2021). Venzke, E (ed.). Smithsonian  
709 Institution. Downloaded 19 Jun 2021. <https://volcano.si.edu/volcano.cfm?vn=275813>, 2013.
- 710 Gusman, A. R., Roger, J., Noble, C., Wang, X., Power, W., and Burbidge, D.: The 2022 Hunga Tonga-Hunga  
711 Ha’apai Volcano Air-Wave Generated Tsunami, *Pure Appl. Geophys.*, 179, 3511–3525,  
712 <https://doi.org/10.1007/s00024-022-03154-1>, 2022.



- 713 Hall, R. and Morley, C. K.: Sundaland basins, in: *Geophysical Monograph Series*, vol. 149, edited by: Clift, P.,  
714 Kuhnt, W., Wang, P., and Hayes, D., American Geophysical Union, Washington, D. C., 55–85,  
715 <https://doi.org/10.1029/149GM04>, 2004.
- 716 Hammond, S. R.: Relationships between lava types, seafloor morphology, and the occurrence of hydrothermal  
717 venting in the ASHES Vent Field of Axial Volcano, *Journal of Geophysical Research: Solid Earth*, 95, 12875–  
718 12893, <https://doi.org/10.1029/JB095iB08p12875>, 1990.
- 719 Hamzah, L., Puspito, N. T., and Imamura, F.: Tsunami Catalog and Zones in Indonesia., *Journal of Natural  
720 Disaster Science*, 22, 25–43, <https://doi.org/10.2328/jnds.22.25>, 2000.
- 721 Hanebuth, T. J. J., Voris, H. K., Yokoyama, Y., Saito, Y., and Okuno, J.: Formation and fate of sedimentary  
722 depocentres on Southeast Asia’s Sunda Shelf over the past sea-level cycle and biogeographic implications, *Earth-  
723 Science Reviews*, 104, 92–110, <https://doi.org/10.1016/j.earscirev.2010.09.006>, 2011.
- 724 Harders, R., Ranero, C. R., and Weinrebe, W.: Characterization of Submarine Landslide Complexes Offshore  
725 Costa Rica: An Evolutionary Model Related to Seamount Subduction. In S. Krastel et al. (eds.), *Submarine Mass  
726 Movements and Their Consequences*, *Advances in Natural and Technological Hazards Research* 37, DOI  
727 10.1007/978-3-319-00972-8\_34, © Springer International Publishing Switzerland 2014, 2014.
- 728 Head, J. W. and Wilson, L.: Deep submarine pyroclastic eruptions: theory and predicted landforms and deposits,  
729 *Journal of Volcanology and Geothermal Research*, 121, 155–193, [https://doi.org/10.1016/S0377-0273\(02\)00425-  
730 0](https://doi.org/10.1016/S0377-0273(02)00425-0), 2003.
- 731 Hidayat, A., Marfai, M. A., and Hadmoko, D. S.: Eruption on Indonesia’s volcanic islands: a review of potential  
732 hazards, fatalities, and management, *IOP Conf. Ser.: Earth Environ. Sci.*, 485, 012061,  
733 <https://doi.org/10.1088/1755-1315/485/1/012061>, 2020.
- 734 Honthaas, C., Réhault, J.-P., Maury, R. C., Bellon, H., Hémond, C., Malod, J.-A., Cornée, J.-J., Villeneuve, M.,  
735 Cotten, J., Burhanuddin, S., Guillou, H., and Arnaud, N.: A Neogene back-arc origin for the Banda Sea basins:  
736 geochemical and geochronological constraints from the Banda ridges (East Indonesia), *Tectonophysics*, 298, 297–  
737 317, [https://doi.org/10.1016/S0040-1951\(98\)00190-5](https://doi.org/10.1016/S0040-1951(98)00190-5), 1998.
- 738 Idárraga-García, J. and León, H.: Unraveling the Underwater Morphological Features of Roncador Bank,  
739 Archipelago of San Andres, Providencia and Santa Catalina (Colombian Caribbean), *Front. Mar. Sci.*, 6, 77,  
740 <https://doi.org/10.3389/fmars.2019.00077>, 2019.
- 741 Jenkins, S. F., Biass, S., Williams, G. T., Hayes, J. L., Tennant, E., Yang, Q., Burgos, V., Meredith, E. S., Lerner,  
742 G. A., Syarifuddin, M., and Verolino, A.: Evaluating and ranking Southeast Asia’s exposure to explosive volcanic  
743 hazards, *Nat. Hazards Earth Syst. Sci.*, 22, 1233–1265, <https://doi.org/10.5194/nhess-22-1233-2022>, 2022.
- 744 Jutzeler, M., Marsh, R., Carey, R. J., White, J. D. L., Talling, P. J., and Karlstrom, L.: On the fate of pumice rafts  
745 formed during the 2012 Havre submarine eruption, *Nat Commun*, 5, 3660, <https://doi.org/10.1038/ncomms4660>,  
746 2014.
- 747 Kim, S.-S. and Wessel, P.: New global seamount census from altimetry-derived gravity data: New global  
748 seamount census, *Geophysical Journal International*, 186, 615–631, [https://doi.org/10.1111/j.1365-  
749 246X.2011.05076.x](https://doi.org/10.1111/j.1365-246X.2011.05076.x), 2011.
- 750 Li, L., Clift, P. D., and Nguyen, H. T.: The sedimentary, magmatic and tectonic evolution of the southwestern  
751 South China Sea revealed by seismic stratigraphic analysis, *Mar Geophys Res*, 34, 341–365,  
752 <https://doi.org/10.1007/s11001-013-9171-y>, 2013.
- 753 Moore, J. G., Clague, D. A., Holcomb, R. T., Lipman, P. W., Normark, W. R., and Torresan, M. E.: Prodigious  
754 submarine landslides on the Hawaiian Ridge, *Journal of Geophysical Research: Solid Earth*, 94, 17465–17484,  
755 <https://doi.org/10.1029/JB094iB12p17465>, 1989.
- 756 Murch, A. P., White, J. D. L., and Carey, R. J.: Characteristics and Deposit Stratigraphy of Submarine-Erupted  
757 Silicic Ash, Havre Volcano, Kermadec Arc, New Zealand, *Front. Earth Sci.*, 7, 1,  
758 <https://doi.org/10.3389/feart.2019.00001>, 2019a.

- 759 Murch, A. P., White, J. D. L., and Carey, R. J.: Unusual fluidal behavior of a silicic magma during fragmentation  
760 in a deep subaqueous eruption, Havre volcano, southwestern Pacific Ocean, *Geology*, 47, 487–490,  
761 <https://doi.org/10.1130/G45657.1>, 2019b.
- 762 Murch, A. P., Portner, R. A., Rubin, K. H., and Clague, D. A.: Deep-subaqueous implosive volcanism at West  
763 Mata seamount, Tonga, *Earth and Planetary Science Letters*, 578, 117328,  
764 <https://doi.org/10.1016/j.epsl.2021.117328>, 2022.
- 765 Mutaqin, B. W., Lavigne, F., Hadmoko, D. S., and Ngalawani, M. N.: Volcanic Eruption-Induced Tsunami in  
766 Indonesia: A Review, *IOP Conf. Ser.: Earth Environ. Sci.*, 256, 012023, <https://doi.org/10.1088/1755-1315/256/1/012023>, 2019.
- 768 NCEI/WDS: National Geophysical Data Center / World Data Service: NCEI/WDS Global Historical Tsunami  
769 Database. NOAA National Centers for Environmental Information. doi:10.7289/V5PN93H7, n.d.
- 770 Newland, E. L., Mingotti, N., and Woods, A. W.: Dynamics of deep-submarine volcanic eruptions, *Sci Rep*, 12,  
771 3276, <https://doi.org/10.1038/s41598-022-07351-9>, 2022.
- 772 Ohno, Y., Iguchi, A., Ijima, M., Yasumoto, K., and Suzuki, A.: Coastal ecological impacts from pumice rafts, *Sci*  
773 *Rep*, 12, 11187, <https://doi.org/10.1038/s41598-022-14614-y>, 2022.
- 774 Okal, E. A. and Synolakis, C. E.: Field survey and numerical simulations: a theoretical comparison of tsunamis  
775 from dislocations and landslides. *Pure Appl Geophys* 160:2177–2188, 2003.
- 776 Omira, R., Ramalho, I., Terrinha, P., Baptista, M. A., Batista, L., and Zitellini, N.: Deep-water seamounts, a  
777 potential source of tsunami generated by landslides? The Hirondelle Seamount, NE Atlantic, *Marine Geology*,  
778 379, 267–280, <https://doi.org/10.1016/j.margeo.2016.06.010>, 2016.
- 779 Paris, A., Heinrich, P., Paris, R., and Abadie, S.: The December 22, 2018 Anak Krakatau, Indonesia, Landslide  
780 and Tsunami: Preliminary Modeling Results, *Pure Appl. Geophys.*, 177, 571–590,  
781 <https://doi.org/10.1007/s00024-019-02394-y>, 2020.
- 782 Paris, R., Switzer, A. D., Belousova, M., Belousov, A., Ontowirjo, B., Whelley, P. L., and Ulvrova, M.: Volcanic  
783 tsunamis: a review of source mechanisms, past events and hazards in Southeast Asia (Indonesia, Philippines, Papua  
784 New Guinea), *Nat Hazards*, 70, 447–470, <https://doi.org/10.1007/s11069-013-0822-8>, 2014.
- 785 Reyes-Hardy, M.-P., Aguilera Barraza, F., Sepúlveda Birke, J. P., Esquivel Cáceres, A., and Inostroza Pizarro,  
786 M.: GIS-based volcanic hazards, vulnerability and risks assessment of the Guallatiri Volcano, Arica y Parinacota  
787 Region, Chile, *Journal of South American Earth Sciences*, 109, 103262,  
788 <https://doi.org/10.1016/j.jsames.2021.103262>, 2021.
- 789 Ribo, M., Cronin, S., Stern, S., Park, S. H., Garvin, J., and Kula, T.: Morphological evolution of the Hunga Tonga–  
790 Hunga Ha‘apai submarine volcano after the explosive eruption (No. EGU23-17221). *Copernicus Meetings.*, 2023.
- 791 Schipper, C. I., White, J. D. L., Houghton, B. F., Shimizu, N., and Stewart, R. B.: “Poseidic” explosive eruptions  
792 at Loihi Seamount, Hawaii, *Geology*, 38, 291–294, <https://doi.org/10.1130/G30351.1>, 2010.
- 793 Schmidt, R. A. L. F., Schmincke, H. U., and Sigurdsson, H.: Seamounts and island building. *Encyclopedia of*  
794 *volcanoes*, 383–402., 2000.
- 795 Schnur, S. R., Chadwick Jr., W. W., Embley, R. W., Ferrini, V. L., de Ronde, C. E. J., Cashman, K. V., Deardorff,  
796 N. D., Merle, S. G., Dziak, R. P., Haxel, J. H., and Matsumoto, H.: A decade of volcanic construction and  
797 destruction at the summit of NW Rota-1 seamount: 2004–2014, *Journal of Geophysical Research: Solid Earth*,  
798 122, 1558–1584, <https://doi.org/10.1002/2016JB013742>, 2017.
- 799 Self, S.: Krakatau revisited: The course of events and interpretation of the 1883 eruption, *GeoJournal*, 28,  
800 <https://doi.org/10.1007/BF00177223>, 1992.
- 801 Sims, K., Reith, A., Bright, E., McKee, J., and Rose, A.: LandScan Global 2021 [Data set]. Oak Ridge National  
802 Laboratory. <https://doi.org/10.48690/1527702>, 2022.

803 Small, C. and Naumann, T.: The global distribution of human population and recent volcanism, *Environmental*  
804 *Hazards*, 3, 93–109, <https://doi.org/10.3763/ehaz.2001.0309>, 2001.

805 Sohn, R. A., Willis, C., Humphris, S., Shank, T. M., Singh, H., Edmonds, H. N., Kunz, C., Hedman, U., Helmke,  
806 E., Jakuba, M., Liljebladh, B., Linder, J., Murphy, C., Nakamura, K., Sato, T., Schlindwein, V., Stranne, C.,  
807 Tausenfrend, M., Upchurch, L., Winsor, P., Jakobsson, M., and Soule, A.: Explosive volcanism on the ultraslow-  
808 spreading Gakkel ridge, Arctic Ocean, *Nature*, 453, 1236–1238, <https://doi.org/10.1038/nature07075>, 2008.

809 Speidel, U.: The Hunga Tonga Hunga Ha’apai Eruption – A Postmortem: What happened to Tonga’s Internet in  
810 January 2022, and what lessons are there to be learned?, in: *Proceedings of the 17th Asian Internet Engineering*  
811 *Conference, AINTEC’22: The 17th Asian Internet Engineering Conference, Hiroshima Japan, 70–78*,  
812 <https://doi.org/10.1145/3570748.3570759>, 2022.

813 Staudigel, H. and Clague, D.: The Geological History of Deep-Sea Volcanoes: Biosphere, Hydrosphere, and  
814 Lithosphere Interactions, *Oceanog.*, 23, 58–71, <https://doi.org/10.5670/oceanog.2010.62>, 2010.

815 Staudigel, H., Koppers, A. A. P., Lavelle, W., Pitcher, T. J., and Shank, T. M.: Defining the Word “Seamount,”  
816 2010.

817 Taha, G., Loughman, R., Colarco, P. R., Zhu, T., Thomason, L. W., and Jaross, G.: Tracking the 2022 Hunga  
818 Tonga-Hunga Ha’apai Aerosol Cloud in the Upper and Middle Stratosphere Using Space-Based Observations,  
819 *Geophysical Research Letters*, 49, <https://doi.org/10.1029/2022GL100091>, 2022.

820 TeleGeography: Worldwide submarine cables.  
821 <https://services.arcgis.com/6DIQcwlPy8knb6sg/arcgis/rest/services/SubmarineCables/FeatureServer>  
822 (Downloaded on 11 June 2021), n.d.

823 The World Bank: The January 15, 2022 Hunga Tonga-Hunga Ha’apai eruption and tsunami, Tonga Global Rapid  
824 Post Disaster Damage Estimation (Grade) Report.  
825 [https://thedocs.worldbank.org/en/doc/b69af83e486aa652d4232276ad698c7b-0070062022/original/GRADE-](https://thedocs.worldbank.org/en/doc/b69af83e486aa652d4232276ad698c7b-0070062022/original/GRADE-Report-Tonga-Volcanic-Eruption.pdf)  
826 [Report-Tonga-Volcanic-Eruption.pdf](https://thedocs.worldbank.org/en/doc/b69af83e486aa652d4232276ad698c7b-0070062022/original/GRADE-Report-Tonga-Volcanic-Eruption.pdf), 2022.

827 The World Bank Group: Global Shipping Traffic Density.  
828 <https://datacatalog.worldbank.org/search/dataset/0037580>. Downloaded on 13 July 2021., n.d.

829 Verolino, A., White, J. D. L., and Brenna, M.: Eruption dynamics at Pahvant Butte volcano, Utah, western USA:  
830 insights from ash-sheet dispersal, grain size, and geochemical data, *Bull Volcanol*, 80, 1–18,  
831 <https://doi.org/10.1007/s00445-018-1256-7>, 2018.

832 Verolino, A., White, J. D. L., Dürig, T., and Cappuccio, F.: Black Point – Pyroclasts of a Surtseyan eruption show  
833 no change during edifice growth to the surface from 100 m water depth, *Journal of Volcanology and Geothermal*  
834 *Research*, 384, 85–102, <https://doi.org/10.1016/j.jvolgeores.2019.07.013>, 2019.

835 Verolino, A., Jenkins, S. F., Sieh, K., Herrin, J. S., Schonwalder-Angel, D., Sihavong, V., and Oh, J. H.: Assessing  
836 volcanic hazard and exposure to lava flows at remote volcanic fields: a case study from the Bolaven Volcanic  
837 Field, Laos, *J Appl. Volcanol.*, 11, 6, <https://doi.org/10.1186/s13617-022-00116-z>, 2022a.

838 Verolino, A., White, J. D. L., Baxter, R. J. M., Schipper, C. I., and Thordarson, T.: Characteristics of Sub-Aerially  
839 Emplaced Pyroclasts in the Surtsey Eruption Deposits: Implications for Diverse Surtseyan Eruptive Styles,  
840 *Geosciences*, 12, 79, <https://doi.org/10.3390/geosciences12020079>, 2022b.

841 Violante, C., Budillon, F., Esposito, E., Porfido, S., and Vittori, E.: SUBMERGED HUMMOCKY  
842 TOPOGRAPHIES AND RELATIONS WITH LANDSLIDES. NORTHWESTERN FLANK OF ISCHIA IS-  
843 LAND, SOUTHERN ITALY, 2003.

844 Vu, T. C.: Earthquake and Tsunami Scenarios in the South China Sea  
845 ([www.ims.nus.edu.sg/Programs/ocean07/files/vu1.ppt](http://www.ims.nus.edu.sg/Programs/ocean07/files/vu1.ppt)), 2008.

- 846 Wang, Q., Guo, J., Wang, Z., Tahchi, E., Wang, X., Moran, B., and Zukerman, M.: Cost-Effective Path Planning  
847 for Submarine Cable Network Extension, *IEEE Access*, 7, 61883–61895,  
848 <https://doi.org/10.1109/ACCESS.2019.2915125>, 2019.
- 849 Wei, X., Luan, X., Meng, F., Lu, Y., He, H., Qiao, J., Yin, J., Wang, Y., and Xue, Y.: Deformation feature and  
850 tectonic model of the Timor Trough: New interpretation of the evolution and mechanism of Banda arc-continent  
851 collision, *Tectonophysics*, 862, 229958, <https://doi.org/10.1016/j.tecto.2023.229958>, 2023.
- 852 Wessel, P.: Seamount Characteristics. In: Pitcher T, Morato T, et al., editors. *Seamounts: Ecology, Fisheries, &*  
853 *Conservation*. Fish and Aquatic Resources Series 12. Blackwell Publishing., p. 3-20., 2007.
- 854 Whelley, P. L., Newhall, C. G., and Bradley, K. E.: The frequency of explosive volcanic eruptions in Southeast  
855 Asia, *Bull Volcanol*, 77, 1, <https://doi.org/10.1007/s00445-014-0893-8>, 2015.
- 856 Wohletz, K. H.: Mechanisms of hydrovolcanic pyroclast formation: Grain-size, scanning electron microscopy,  
857 and experimental studies, 33, 1983.
- 858 Wohletz, K. H.: Explosive magma-water interactions: Thermodynamics, explosion mechanisms, and field studies,  
859 *Bull Volcanol*, 48, 245–264, <https://doi.org/10.1007/BF01081754>, 1986.
- 860 Xia, S., Zhao, F., Zhao, D., Fan, C., Wu, S., Mi, L., Sun, J., Cao, J., and Wan, K.: Crustal plumbing system of  
861 post-rift magmatism in the northern margin of South China Sea: New insights from integrated seismology,  
862 *Tectonophysics*, 744, 227–238, <https://doi.org/10.1016/j.tecto.2018.07.002>, 2018.
- 863 Yang, F., Huang, X.-L., Xu, Y.-G., and He, P.-L.: Plume-ridge interaction in the South China Sea: Thermometric  
864 evidence from Hole U1431E of IODP Expedition 349, *Lithos*, 324–325, 466–478,  
865 <https://doi.org/10.1016/j.lithos.2018.11.031>, 2019.
- 866 Yang, X., Singh, S. C., and Deighton, I.: The Margin-Oblique Kumawa Strike-Slip Fault in the Banda Forearc,  
867 East Indonesia: Structural Deformation, Tectonic Origin and Geohazard Implication, *Tectonics*, 40,  
868 <https://doi.org/10.1029/2020TC006567>, 2021.
- 869 Zhao, F., Alves, T. M., Xia, S., Li, W., Wang, L., Mi, L., Wu, S., Cao, J., and Fan, C.: Along-strike segmentation  
870 of the South China Sea margin imposed by inherited pre-rift basement structures, *Earth and Planetary Science*  
871 *Letters*, 530, 115862, <https://doi.org/10.1016/j.epsl.2019.115862>, 2020.
- 872 Zhao, F., Berndt, C., Alves, T. M., Xia, S., Li, L., Mi, L., and Fan, C.: Widespread hydrothermal vents and  
873 associated volcanism record prolonged Cenozoic magmatism in the South China Sea, *GSA Bulletin*, 133, 2645–  
874 2660, <https://doi.org/10.1130/B35897.1>, 2021.
- 875 Zorn, E. U., Orynbaikyzy, A., Plank, S., Babeyko, A., Darmawan, H., Robbany, I. F., and Walter, T. R.:  
876 Identification and ranking of subaerial volcanic tsunami hazard sources in Southeast Asia, *Nat. Hazards Earth*  
877 *Syst. Sci.*, 22, 3083–3104, <https://doi.org/10.5194/nhess-22-3083-2022>, 2022.

878

#### 879 **Acknowledgements**

880 We would like to thank the editor and reviewers for improving this manuscript. This research was supported by  
881 the Earth Observatory of Singapore via its funding from the National Research Foundation Singapore and the  
882 Singapore Ministry of Education under the Research Centers of Excellence initiative. This work comprises EOS  
883 contribution number 531.

#### 884 **Author contribution**

885 AV: Paper conceptualisation and preparation, figures production, data elaboration, analysis  
886 and interpretation, editing; SFW: data elaboration, analysis and interpretation; SJ: paper conceptualisation,  
887 editing; FC: paper conceptualisation, editing; ADS: editing.

888 **Competing Interests**

889 We declare no competing interests.

## Supplementary Files

This is a list of supplementary files associated with this preprint. Click to download.

- [Supplementaryinformation.docx](#)
- [TableS1.xlsx](#)
- [TableS2.xlsx](#)
